# Supplementary material for: Reactive organic carbon air emissions from mobile sources in the United States
Source: Copernicus journal article supplement (doi:10.5194/acp-23-13469-2023), 2023-10-25
Supplement: Supplementary file 1 [file acp-23-13469-2023-supplement.zip]

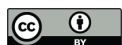

*Supplement of*

## **Reactive organic carbon air emissions from mobile sources in the United States**

**Benjamin N. Murphy et al.**

*Correspondence to:* Benjamin N. Murphy ([murphy.ben@epa.gov](mailto:murphy.ben@epa.gov))

- [acp-23-13469-2023-supplement-title-page.pdf](#)
- [Murphy\\_MobileROC\\_Supporting\\_Tables\\_v3.xlsx](#)
- [Murphy\\_MobileRoc\\_2023\\_SupportInfo\\_v5.pdf](#)

The copyright of individual parts of the supplement might differ from the article licence.
