# Supplementary material for: Reactive organic carbon air emissions from mobile sources in the United States
Source: Copernicus journal article supplement (doi:10.5194/acp-23-13469-2023), 2023-10-25
Supplement: Supplementary file 2 [file acp-23-13469-2023-supplement.zip]

Archive with 3 entries (3 files):
- acp-23-13469-2023-supplement-title-page.pdf
- Murphy_MobileRoc_2023_SupportInfo_v5.pdf
- Murphy_MobileROC_Supporting_Tables_v3.xlsx
