# Supplementary material for: Reactive organic carbon air emissions from mobile sources in the United States
Source: Copernicus journal article supplement (doi:10.5194/acp-23-13469-2023), 2023-10-25
Supplement: Supplementary file 2 [file acp-23-13469-2023-supplement.zip › Murphy_MobileROC_Supporting_Tables_v3.xlsx]

## Sheet: Table S1a
Table S1a. Properties, fuel usage, and 2016 annual emissions for mobile sector sources.
Source	Source_Name	Sector	Subsector	Fuel	Estimated Fuel Used (kt)*	Gas Emissions					Particle emissions
						SPECIATE NMOG Profile	GROC Profile	VOC (kt)	NMOG (kt)	EF_NMOG (mg/kg)**	SPECIATE PM Profile	CROC Profile	EC/PM Fraction	PM2.5 (kt)	OM (kt)	EF_OM (mg/kg) **	OM/OC
1	Pre-Tier 2 E10 Exhaust; Gasoline pre2001; Cold Start	onroad	Start	Gasoline	2088.97	8751a	100GROC	105.924	108.972	10717.3	8992	100CROC	0.341145	2.29477	1.17782	149.195	1.2
2	Tier 2 E10 Exhaust; Gasoline 2001-2003; Cold Start	onroad	Start	Gasoline	1315.22	8757	101GROC	29.7023	30.6397	4480.31	8992	100CROC	0.355261	0.479321	0.245878	54.0734	1.2
3	Tier 2 E10 Exhaust; Gasoline 2004+; Cold Start	onroad	Start	Gasoline	9244.16	8757	101GROC	108.884	112.321	2477.59	8992	100CROC	0.53902	1.74009	0.636489	17.8984	1.2
4	Pre-Tier 2 E10 Exhaust; Gasoline pre2001; Hot Stabilized Running	onroad	Running	Gasoline	77106.3	8751a	102GROC	242.927	249.916	3241.19	8993	101CROC	0.145554	8.22472	5.73714	74.4055	1.2
5	Tier 2 E10 Exhaust; Gasoline 2001-2003; Hot Stabilized Running	onroad	Running	Gasoline	42430.8	8757	103GROC	12.0599	12.8524	302.901	8993	101CROC	0.145907	1.49105	1.04266	24.5732	1.2
6	Tier 2 E10 Exhaust; Gasoline 2004+; Hot Stabilized Running	onroad	Running	Gasoline	274294	8757	103GROC	36.8473	39.2685	143.162	8993	101CROC	0.254039	2.64034	1.53633	5.60104	1.2
7	Conventional Heavy Duty Diesel Exhaust - Idle, pre-2007; Non-DPF	onroad	Idle	Diesel Fuel	428.668	8774	104GROC	4.30995	4.30995	10054.3	8994	102CROC	0.217556	1.03907	0.599428	1398.35	1.2
8	Conventional Heavy Duty Diesel Exhaust - pre-2007; pre-DPF; start	onroad	Start	Diesel Fuel	208.719	8774	104GROC	5.42955	5.42955	2961.28	8994	103CROC	0.649567	0.131371	0.0594054	387.861	1.2
9	Conventional Heavy Duty Diesel Exhaust - pre-2007; pre-DPF; running	onroad	Running	Diesel Fuel	46317.4	8774	104GROC	103.86	103.86	2242.36	8995	103CROC	0.652441	62.2505	18.1138	391.081	1.2
10	Heavy Duty Diesel Exhaust, 2007-2009; DPF	onroad	Running	Diesel Fuel	22626	8775	105GROC	6.32063	6.60591	291.961	8996	104CROC	0.0897529	1.38809	0.258945	11.4445	1.2
11	Heavy Duty Diesel Exhaust, 2010+; DPF+SCR	onroad	Running	Diesel Fuel	79573.5	95335a	106GROC	11.7682	13.2316	166.282	8996	104CROC	0.0980928	1.29352	0.23909	3.00465	1.2
12	CNG - no aftertreatment	onroad	Running	Compressed Natural Gas (CNG)	98.3328	1001	107GROC	0.737789	0.834405	8485.52	95219a	105CROC	0.092469	0.00376589	0.00167166	17	1.2
13	CNG – oxidation catalyst	onroad	Running	Compressed Natural Gas (CNG)	1010.76	1001	107GROC	0.75296	1.00395	993.261	95220a	106CROC	0.11081	0.00991584	0.00445835	4.41089	1.2
14	Tier 2 E85 Exhaust; Cold Start	onroad	Start	Ethanol (E-85)	31.6665	8855	108GROC	0.204905	0.211543	1345.92	8992	100CROC	0.459825	0.00180616	0.000707866	7.19249	1.2
15	Tier 2 E85 Exhaust; Hot Running	onroad	Running	Ethanol (E-85)	950.78	8855	109GROC	0.0559831	0.0605093	63.6417	8993	101CROC	0.222472	0.00555288	0.00337341	3.54804	1.2
16	SI 2-stroke E0	nonroad	Running	Gasoline	4.43907	95327	110GROC	0.742315	0.744535	167723	91113	107CROC	0.12178	0.0455392	0.0270514	6093.94	1.25
17	SI 2-stroke E10	nonroad	Running	Gasoline	2898.98	95328	111GROC	511.398	512.849	176907	91113	107CROC	0.12178	29.7399	17.6662	6093.94	1.25
18	SI 4-stroke E0	nonroad	Running	Gasoline	22.9754	95329	112GROC	0.331572	0.336486	14642.2	91113	107CROC	0.12178	0.00901279	0.00535382	233.024	1.25
19	SI 4-stroke E10	nonroad	Running	Gasoline	15004.3	95330	113GROC	223.559	227.015	15126.6	91113	107CROC	0.12178	5.8859	3.49637	233.024	1.25
20	CI Tier 0	nonroad	Running	Diesel	3045.43	95331	114GROC	21.236	21.336	7002.46	8994	108CROC	0.464031	17.1569	7.15136	2348.22	1.2
21	CI Tier 1	nonroad	Running	Diesel	5864.52	95332	115GROC	16.7813	16.872	2873.74	8994	108CROC	0.464031	14.9963	6.25076	1065.86	1.2
22	CI Tier 2	nonroad	Running	Diesel	8240.35	95333	116GROC	16.986	16.986	2060.28	8994	108CROC	0.464031	10.6488	4.43864	538.647	1.2
23	CI Tier 3	nonroad	Running	Diesel	7262.18	95333	116GROC	9.23979	9.23979	1271.98	8994	108CROC	0.464031	11.2065	4.67109	643.208	1.2
24	CI Tier 4; No DPF	nonroad	Running	Diesel	8036.06	95333	116GROC	4.9784	4.9784	617.428	8994	108CROC	0.464031	2.8961	1.20715	149.794	1.2
25	CI Tier 4 DPF; no SCR	nonroad	Running	Diesel	4975.53	8775	105GROC	0.146592	0.153209	30.7671	8996	109CROC	0.0998421	0.0709288	0.0190087	3.82044	1.2
26	CI Tier 4 DPF + SCR	nonroad	Running	Diesel	1547.15	95335a	106GROC	0.0894015	0.100519	64.9691	8996	109CROC	0.0998421	0.0150564	0.00403507	2.60807	1.2
27	CNG - Oxidation Catalyst	nonroad	Running	CNG	863.087	1001	107GROC	3.49745	3.95545	4582.91	95219a	105CROC	0.0925	0.275846	0.122448	141.872	1.2
28	LPG Exhaust	nonroad	Running	LPG	4495.27	8860	117GROC	5.91767	6.34693	1411.61	95219a	105CROC	0.0925	1.38845	0.616333	137.107	1.2
29	Airports: AGS gas	Aircraft	Airport	Gasoline	112.052	1186	118GROC	0.604989	0.624579	1774.87	91113	107CROC	0.12178	0.0481548	0.0286052	153.971	1.25
30	Airports: AGS diesel	Aircraft	Airport	Diesel	209.247	4674	119GROC	0.214742	0.214742	975.4	8994	110CROC	0.463092	0.0697449	0.0290711	121.92	1.2
31	Aircraft: AvGas	Aircraft	Airport	Aviation Gasoline	401.892	5565	120GROC	2.35994	2.38113	5924.81	95783	111CROC	0.344364	2.37536	0.560753	15	1.25
32	Aircraft: Jet Fuel	Aircraft	Airport	Jet Fuel	8178	5565	120GROC	48.0219	48.4531	5924.81	95783	111CROC	0.344364	5.75699	1.35906	15	1.25
33	Class I Line Haul	Rail	Rail	Diesel	7351.75	8774	104GROC	20.8569	21.2496	2890.42	8994	112CROC	0.464031	12.5997	5.25182	730.555	1.2
34	Class II/III Line Haul	Rail	Rail	Diesel	427.184	8774	104GROC	1.32592	1.35089	3162.31	8994	112CROC	0.464031	0.857164	0.357283	793.237	1.2
35	Commuter	Rail	Rail	Diesel	496.429	8774	104GROC	0.802434	0.817543	1646.85	8994	112CROC	0.464031	0.501173	0.208899	389.611	1.2
36	Passenger	Rail	Rail	Diesel	427.434	8774	104GROC	0.69091	0.703919	1646.85	8994	112CROC	0.464031	0.402099	0.167603	389.611	1.2
37	Yard Locomotives	Rail	Rail	Diesel	544.335	8774	104GROC	2.48145	2.52817	4644.51	8994	112CROC	0.464031	0.912619	0.380399	797.228	1.2
38	CMV diesel	Marine	Marine	Marine Diesel	21806.4	95331NEIHP	121GROC	28.5009	29.998	1375.65	8994	113CROC	0.464031	9.92323	4.13621	375.139	1.2
39	CMV residual	Marine	Marine	Residual Fuel Oil	5636.18	95331NEIHP	122GROC	8.87698	9.34323	1657.72	5675AE6	114CROC	0.070922	18.4883	9.83421	2695	1.20002
40	E10 Evap vapor venting	onroad	Evaporative	Gasoline	NA	8754	8754	208.103	208.103	NA			NA	NA	NA	NA	NA
41	E10 Evap permeation	onroad	Evaporative	Gasoline	NA	8769	8769	96.1294	96.1294	NA			NA	NA	NA	NA	NA
42	E10 Evap headspace	onroad	Evaporative	Gasoline	NA	8870	8870	107.138	107.138	NA			NA	NA	NA	NA	NA
43	E10 Evap liquid (leaks, spillage)	onroad	Evaporative	Gasoline	NA	8754	95115	182.433	182.433	NA			NA	NA	NA	NA	NA
44	Liquid diesel (refueling spillage)	onroad	Evaporative	Diesel Fuel	NA	95120a	95120c	13.148	13.148	NA			NA	NA	NA	NA	NA
45	Onroad E85 Evap	onroad	Evaporative	Ethanol (E-85)	NA	8934	8934	0.456691	0.456691	NA			NA	NA	NA	NA	NA
46	SI gasoline evap E10	nonroad	Evaporative	Gasoline	NA	8754	8754	101.163	101.163	NA			NA	NA	NA	NA	NA
47	SI gasoline evap reformulated	nonroad	Evaporative	Gasoline	NA	8753	8753	0.154906	0.154906	NA			NA	NA	NA	NA	NA
48	SI Headspace E0	nonroad	Evaporative	Gasoline	NA	8869	8869	0.143309	0.143309	NA			NA	NA	NA	NA	NA
49	SI Headspace E10	nonroad	Evaporative	Gasoline	NA	8870	8870	93.5892	93.5892	NA			NA	NA	NA	NA	NA
50	SI permeation E0	nonroad	Evaporative	Gasoline	NA	8766	8766	0.108674	0.108674	NA			NA	NA	NA	NA	NA
51	SI permeation E10	nonroad	Evaporative	Gasoline	NA	8769	8769	70.9706	70.9706	NA			NA	NA	NA	NA	NA
	* Annual fuel use for air, marine, and rail sources (#29-39) were calculated by dividing total NMOG emissions by the EF_NMOG emission factors.
	** The emission rate for the start processes (Sources 1, 2, 3, 8 and 14) include both start and running emissions over Phase 1 of the LA-92 cycle as discussed in Table S1a. As such, the start emisison factors (g/kg) are different than what would be obtained from dividing the start emissions by the fuel consumed from start.
	*** The emission rate for Airport Ground Support (Sources 29 and 30), were estimated from MOVES3. The emissions inventory for Airport Ground Support are from the 2016v1 platform, which were adjusted from airport ground support estimated from FAA’s Aviation Environmental Design Tool (AEDT). The fuel used is estimated by dividing the emissions from AEDT by the emission rate estimated from MOVES. Th…

## Sheet: Table S1b
Table S1b. Phase 1 Start Emission Rates Estimated from MOVES3 for 2016
Source	Source Name	Fuel	Fuel rate			Emission rate
			Per Start (kg/start)	Per Mile (kg/mile)	Per Phase 1 (kg)	Pollutant	Per Start (mg/start)	Per Mile (mg/mile)	Per Phase 1 (mg)	Phase 1 Fuel-based Emission Rate (mg/kg)
1	Pre-Tier 2 E10 Exhaust; Gasoline pre2004; Cold Start	Gasoline	0.018	0.083	0.118	NMOG	939.439	269.674	1263.05	10717.3
						VOC	913.167	262.132	1227.73	10417.6
						PM2.5	19.7831	8.87494	30.433	258.232
						OM	10.154	6.1907	17.5828	149.195
2	Tier 2 E10 Exhaust; Gasoline 2001-2004; Cold Start	Gasoline	0.02	0.077	0.113	NMOG	477.489	23.3032	505.453	4480.31
						VOC	462.881	21.8664	489.121	4335.55
						PM2.5	7.46974	2.7035	10.7139	94.9679
						OM	3.83177	1.8905	6.10037	54.0734
3	Tier 2 E10 Exhaust; Gasoline 2004+; Cold Start	Gasoline	0.019	0.066	0.098	NMOG	232.45	9.45709	243.798	2477.59
						VOC	225.339	8.87399	235.987	2398.21
						PM2.5	3.60114	0.635877	4.36419	44.351
						OM	1.31723	0.369997	1.76122	17.8984
8	Conventional Heavy Duty Diesel Exhaust - pre-2007; pre-DPF; start	Diesel Fuel	0.008	0.217	0.268	NMOG	211.138	486.322	794.724	2961.28
						VOC	211.138	486.322	794.724	2961.28
						PM2.5	5.10861	291.486	354.891	1322.39
						OM	2.31009	84.8174	104.091	387.861
14	Tier 2 E85 Exhaust; Cold Start	Ethanol (E-85)	0.029	0.1	0.148	NMOG	192.111	6.34483	199.725	1345.92
						VOC	186.083	5.87023	193.128	1301.46
						PM2.5	1.64025	0.58226	2.33897	15.762
						OM	0.642844	0.353726	1.06732	7.19249

## Sheet: Table S1c
Table S1c. Airport Ground Support Equipment Emissions estimated by MOVES3 for 2016
			Gas Emissions				Particle Emissions
Source_Name	Fuel	Estimated Fuel Used (metric tons)	SPECIATE VOC Profile	VOC (kg)	NMOG (kg)	EF_NMOG (mg/kg)	SPECIATE PM Profile	EC/PM	PM2.5 (kg)	OM (kg)	EF_OM (mg/kg)
CI Tier 0	Diesel	5648.95	95331	28931.8	29068.1	5145.75	8994	0.464031	24761.1	10320.9	1827.06
CI Tier 1	Diesel	19454.9	95332	36796.7	36995.6	1901.61	8994	0.464031	39871.2	16619.1	854.239
CI Tier 2	Diesel	29718.6	95333	52654.5	52654.5	1771.77	8994	0.464031	37490.8	15626.9	525.831
CI Tier 3	Diesel	68249.8	95333	84395	84395	1236.56	8994	0.464031	112566	46920	687.474
CI Tier 4, DPF + SCR	Diesel	15892.9	95335a	916.677	1030.67	64.8509	8996	0.0998421	147.696	39.5823	2.49056
CI Tier 4, DPF no SCR	Diesel	27758.4	8775	696.638	728.082	26.2292	8996	0.0998421	425.258	113.968	4.10571
CI Tier 4, no DPF	Diesel	41732.7	95333	9057.78	9057.78	217.043	8994	0.464031	6849.77	2855.12	68.4147
SI 4-stroke E0	Gasoline	8.31558	95329	45.5842	46.2599	5563.04	91113	0.12178	3.22588	1.91625	230.441
SI 4-stroke E10	Gasoline	5430.57	95330	30734.7	31209.9	5747.07	91113	0.12178	2106.7	1251.43	230.442
SI gasoline evap E10	Gasoline	NA	8754	3896.93	3896.93	NA	NA	NA	NA	NA	NA
SI gasoline evap reformulated	Gasoline	NA	8753	5.96718	5.96718	NA	NA	NA	NA	NA	NA
SI Headspace E0	Gasoline	NA	8869	14.775	14.775	NA	NA	NA	NA	NA	NA
SI Headspace E10	Gasoline	NA	8870	9648.97	9648.97	NA	NA	NA	NA	NA	NA
SI permeation E0	Gasoline	NA	8766	0.262754	0.262754	NA	NA	NA	NA	NA	NA
SI permeation E10	Gasoline	NA	8769	171.594	171.594	NA	NA	NA	NA	NA	NA
Nonroad LPG exhaust	LPG	3197.37	8860	2931.13	3143.75	983.231	95219	0.3699	986.367	437.848	51.3641
Airports: AGS* Diesel	Diesel	208456	Combined	213449	213930	1026.26	Combined	0.463092	222112	92495.6	443.718
Airports: AGS Gasoline	Gasoline	5438.89	Combined	44518.8	44994.6	8272.76	Combined	0.12178	2109.92	1253.35	230.442
*AGS: Airport ground support

## Sheet: Table S2
Table S2. Mass-based contribution of IVOC to total GROC across mobile sector sources.
Source	Source_Name	Sector	Subsector	Fuel	IVOC/GROC	Speciation Profile*	Reference
1	Pre-Tier 2 E10 Exhaust; Gasoline pre2004; Cold Start	Onroad	Start	Gasoline	0.046	Gas_Cold_Start	Zhao et al. (2016)
2	Tier 2 E10 Exhaust; Gasoline 2001-2004; Cold Start	Onroad	Start	Gasoline	0.046	Gas_Cold_Start	Zhao et al. (2016)
3	Tier 2 E10 Exhaust; Gasoline 2004+; Cold Start	Onroad	Start	Gasoline	0.046	Gas_Cold_Start	Zhao et al. (2016)
4	Pre-Tier 2 E10 Exhaust; Gasoline pre2004; Hot Stabilized Running	Onroad	Running	Gasoline	0.19	Gas_Hot_Running	Zhao et al. (2016)
5	Tier 2 E10 Exhaust; Gasoline 2001-2004; Hot Stabilized Running	Onroad	Running	Gasoline	0.19	Gas_Hot_Running	Zhao et al. (2016)
6	Tier 2 E10 Exhaust; Gasoline 2004+; Hot Stabilized Running	Onroad	Running	Gasoline	0.19	Gas_Hot_Running	Zhao et al. (2016)
7	Conventional Heavy Duty Diesel Exhaust - Idle, pre-2007; Non-DPF	Onroad	Idle	Diesel	0.57	Diesel_NonDPF	Zhao et al. (2015)
8	Conventional Heavy Duty Diesel Exhaust - pre-2007; pre-DPF; start	Onroad	Start	Diesel	0.57	Diesel_NonDPF	Zhao et al. (2015)
9	Conventional Heavy Duty Diesel Exhaust - pre-2007; pre-DPF; running	Onroad	Running	Diesel	0.57	Diesel_NonDPF	Zhao et al. (2015)
10	Heavy Duty Diesel Exhaust, 2007-2009; DPF	Onroad	Running	Diesel	0.522	Diesel_DPF	Lu et al., (2018)
11	Heavy Duty Diesel Exhaust, 2010+; DPF+SCR	Onroad	Running	Diesel	0.522	Diesel_DPF	Lu et al., (2018)
12	CNG - no aftertreatment	Onroad	Running	CNG	0.046	Gas_Cold_Start	Zhao et al. (2016)
13	CNG – oxidation catalyst	Onroad	Running	CNG	0.046	Gas_Cold_Start	Zhao et al. (2016)
14	Tier 2 E85 Exhaust; Cold Start	Onroad	Start	E85	0.046	Gas_Cold_Start	Zhao et al. (2016)
15	Tier 2 E85 Exhaust; Hot Running	Onroad	Running	E85	0.19	Gas_Hot_Running	Zhao et al. (2016)
16	SI 2-stroke E0	Nonroad	Running	Gasoline	0.046	Gas_Nonroad	Lu et al., (2018)
17	SI 2-stroke E10	Nonroad	Running	Gasoline	0.046	Gas_Nonroad	Lu et al., (2018)
18	SI 4-stroke E0	Nonroad	Running	Gasoline	0.046	Gas_Nonroad	Lu et al., (2018)
19	SI 4-stroke E10	Nonroad	Running	Gasoline	0.046	Gas_Nonroad	Lu et al., (2018)
20	CI Tier 0	Nonroad	Running	Diesel	0.2488	Diesel_Nonroad	Zhao et al. (2015); Jathar et al. (2017)
21	CI Tier 1	Nonroad	Running	Diesel	0.2488	Diesel_Nonroad	Zhao et al. (2015); Jathar et al. (2017)
22	CI Tier 2	Nonroad	Running	Diesel	0.2488	Diesel_Nonroad	Zhao et al. (2015); Jathar et al. (2017)
23	CI Tier 3	Nonroad	Running	Diesel	0.2488	Diesel_Nonroad	Zhao et al. (2015); Jathar et al. (2017)
24	CI Tier 4; No DPF	Nonroad	Running	Diesel	0.2488	Diesel_Nonroad	Zhao et al. (2015); Jathar et al. (2017)
25	CI Tier 4 DPF; no SCR	Nonroad	Running	Diesel	0.522	Diesel_DPF	Lu et al., (2018)
26	CI Tier 4 DPF + SCR	Nonroad	Running	Diesel	0.522	Diesel_DPF	Lu et al., (2018)
27	CNG - Oxidation Catalyst	Nonroad	Running	CNG	0.046	Gas_Cold_Start	Zhao et al. (2016)
28	LPG Exhaust	Nonroad	Running	LPG	0.046	Gas_Cold_Start	Zhao et al. (2016)
29	Airports: AGS gas	Air/Marine/Rail	Airport	Gasoline	0.046	Gas_Cold_Start	Zhao et al. (2016)
30	Airports: AGS diesel	Air/Marine/Rail	Airport	Diesel	0.2488	Diesel_DPF	Lu et al., (2018)
31	Airports: Aircraft Aviation Gasoline	Air/Marine/Rail	Airport	Aviation Gasoline	0.2845	Gas_Turbine	Lu et al., (2018); Presto et al. (2011)
32	Airports: Aircraft Jetfuel	Air/Marine/Rail	Airport	Gas-Turbine	0.2845	Gas_Turbine	Lu et al., (2018); Presto et al. (2011)
33	Class I Line Haul	Air/Marine/Rail	Rail	Diesel	0.57	Diesel_NonDPF	Zhao et al. (2015)
34	Class II/III Line Haul	Air/Marine/Rail	Rail	Diesel	0.57	Diesel_NonDPF	Zhao et al. (2015)
35	Commuter	Air/Marine/Rail	Rail	Diesel	0.57	Diesel_NonDPF	Zhao et al. (2015)
36	Passenger	Air/Marine/Rail	Rail	Diesel	0.57	Diesel_NonDPF	Zhao et al. (2015)
37	Yard Locomotives	Air/Marine/Rail	Rail	Diesel	0.57	Diesel_NonDPF	Zhao et al. (2015)
38	CMV diesel	Air/Marine/Rail	Marine	Diesel	0.57	Diesel_NonDPF	Zhao et al. (2015)
39	CMV residual	Air/Marine/Rail	Marine	Residual_Oil	0.67	ResidualOil_Marine	Huang et al. (2018)
40	E10 Evap vapor venting	Onroad	Evaporative	Gasoline	0.000552164	E10 Evap	Gorse et al. (1997)
41	E10 Evap permeation	Onroad	Evaporative	Gasoline	7.92905e-05	E10 evap permeation	Haskew and Liberty (2010)
42	E10 Evap headspace	Onroad	Evaporative	Gasoline	0.000557141	E10 Headspace	OTAQ (2011)
43	E10 Evap liquid (leaks, spillage)	Onroad	Evaporative	Gasoline	0.000552164	E10 Evap	Gorse et al. (1997)
44	Liquid diesel (refueling spillage)	Onroad	Evaporative	Diesel Fuel	0.620568	Diesel Headspace	Gentner et al. (2012)
45	Onroad E85 Evap	Onroad	Evaporative	Ethanol (E-85)	0	E85 Evap	Haskew and Liberty (2011)
46	SI gasoline evap E10	Nonroad	Evaporative	Gasoline	0.000552164	Gasoline Vehicle - Evaporative emission - E10 ethanol gasoline	Gorse et al. (1997)
47	SI gasoline evap reformulated	Nonroad	Evaporative	Gasoline	0.00167758	Gasoline Vehicle - Evaporative emission - Reformulated gasoline	Gorse et al. (1997)
48	SI Headspace E0	Nonroad	Evaporative	Gasoline	0.0002277	Gasoline Headspace Vapor - 0% Ethanol (E0) Combined - EPAct/V2/E-89 Program	OTAQ (2011)
49	SI Headspace E10	Nonroad	Evaporative	Gasoline	0.000557141	Gasoline Headspace Vapor - 10% Ethanol (E10) Combined - EPAct/V2/E-89 Program	OTAQ (2011)
50	SI permeation E0	Nonroad	Evaporative	Gasoline	0	Diurnal Permeation Evaporative Emissions from Gasoline Vehicles using 0% Ethanol - Combined - Composite Profile	Haskew and Liberty (2010)
51	SI permeation E10	Nonroad	Evaporative	Gasoline	7.92905e-05	Diurnal Permeation Evaporative Emissions from Gasoline Vehicles using 10% Ethanol - Combined - Composite Profile	Haskew and Liberty (2010)

## Sheet: Table S3
Table S3. IVOC speciation in g/ (g GROC) of explicit compounds and lumped species across mobile source categories.
Species	CAS	SPECIATE ID	log10(C*)	Gas_Cold_Start	Gas_Hot_Running	Gas_Nonroad	Gas_Turbine	Diesel_NonDPF	Diesel_DPF	Diesel_Nonroad	ResidualOil_Marine
ROCP6ALK		3402	6	0.00415544	0.0191708	0.000258122	0.00706069	0.00203718	0.0118388	0.000363644	0.000386899
ROCP5ALK		3401	5	0.00122355	0.00800873	5.90559e-05	0.00387599	0.010646	0.00685477	0.000214318	7.16433e-05
ROCP4ALK		3400	4	0.00110115	0.00873073	4.71269e-05	6.55646e-05	0.00621557	0.000395503	0.00203596	7.8763e-05
ROCP3ALK		3399	3	0.00119469	0.00681485	0.000166879	1.80961e-05	0.00122591	0.000259623	0.000298524	6.04165e-05
ROCP6ARO		3338	6	0.0221086	0.0726076	0.000102283	4.67971e-05	4.19372e-05	0.000184301	3.11902e-06	5.57555e-08
ROCP5ARO		3337	5	0.00420093	0.0201215	0.000223417	9.21526e-05	2.90933e-05	6.21205e-06	1.76527e-05	0
ROCP6BRN		3391	6	0.00111798	0.00572508	0.000602033	0.0265079	0.027734	0.0646759	0.0135451	0.0361676
ROCP5BRN		3390	5	0.000482164	0.00301446	0.000310903	0.00666667	0.0246138	0.026296	0.0114044	0.0542859
ROCP4BRN		3389	4	0.000282043	0.00182916	2.09897e-05	0.00233242	0.0114124	0.00391713	0.00331379	0.0856526
ROCP3BRN		3388	3	0.000273692	0.00167051	9.75852e-05	0.0015873	0.00605988	0.00239175	0.00183447	0.0306867
ROCP6CYC		3380	6	0.000668368	3.53566e-06	1.65186e-05	0.153819	0.140543	0.168895	0.0663582	0.0580188
ROCP5CYC		3379	5	0.000122973	1.53555e-05	0.00306235	0.0248592	0.156212	0.148024	0.0646724	0.0938865
ROCP4CYC		3378	4	0.000796651	0.0103438	0.000101413	0.0170298	0.0958826	0.0250701	0.0339611	0.0891116
ROCP3CYC		3377	3	0.00165053	0.0118216	2.36648e-06	0.00709526	0.0343526	0.0107814	0.0103732	0.135413
n-Dodecane	112-40-3	599	6.14794	0.0002219	0.00138841	0.000329543	0.00636284	0.00425367	0.0169164	0.010585	0.00527591
n-Tridecane	629-50-5	609	5.78684	0.000151887	0.000818079	0.000112082	0.00341703	0.00471581	0.0117324	0.00822411	0.0059961
Tetradecane	629-59-4	1051	5.08875	5.91574e-05	0.000335527	4.76721e-05	0.00139237	0.00280642	0.00611597	0.00446119	0.0102469
Pentadecane	629-62-9	1049	4.61482	2.69724e-05	0.000187884	2.40665e-05	0.000300837	0.00277769	0.00221961	0.00249865	0.0110852
Hexadecane	544-76-3	1045	4.18705	2.04017e-05	0.000167719	1.48483e-05	6.52257e-05	0.00228517	0.000750457	0.00151781	0.0101148
Heptadecane	629-78-7	1043	3.56212	1.69677e-05	0.000129076	1.25739e-05	0.00015175	0.00180149	0.000426733	0.00111411	0.0106856
Octadecane	91-20-3	1048	5.63952	1.82504e-05	0.000114983	0.00220572	0.000198339	0.00178595	0.000326537	0.00105624	0.00989591
Nonadecane	91-57-6	1047	5.30614	8.18221e-06	5.43169e-05	0.000889879	0.000543104	0.00106738	0.000157235	0.00061231	0.00973258
Eicosane	90-12-0	1042	5.36088	1.15787e-05	0.000100035	0.000452147	0.000311486	0.000670063	9.45557e-05	0.00038231	0.00427858
n-Heneicosane	629-94-7	1595	2.63	1.39368e-05	0.000104412	0.000534994	0.000193015	0.000378757	7.33032e-05	0.00022603	0.00449838
2,6,10-Trimethyldodecane	3891-98-3	1690	5.58	1.86503e-05	5.92155e-05	0.000247361		0.00136824	0.00377155	0.0025699
2,6,10-Trimethyltridecane	3891-99-4	1692	5.1	5.15216e-06	1.42802e-05	1.27928e-05		0.000967795	0.000896281	0.000932038
2,6,10-Trimethylpentadecane	3892-00-0	2129	4.3	4.64979e-06	3.31574e-05	5.15272e-05		0.00124547	0.000170334	0.000707904
Pristane	1921-70-6	1704	4.44	7.99199e-06	0.000117094	4.28496e-05	9.14491e-05	0.00169723	0.000193431	0.000945328
Phytane	638-36-8	1705	4.41	7.79397e-06	6.25655e-05	7.6296e-05	0.000115809	0.00115405	0.000145794	0.000649924
Hexylcyclohexane	4292-75-5	480	6.02	1.72057e-05	8.35374e-05	2.09567e-05		0.000651867	0.00206615	0.00135901
Heptylcyclohexane	5617-41-4	1840	5.56	5.16599e-06	2.55935e-05	3.67038e-05	0.000447262	0.000592529	0.00144966	0.00102109
Octylcyclohexane	1795-15-9	1841	5.01	2.86573e-06	1.81926e-05	1.84361e-05	0.000211651	0.000344997	0.000699147	0.000522072
n-Nonylcyclohexane	2883-02-5	1694	4.63	1.7632e-06	1.61793e-05	1.92107e-05	9.58419e-05	0.000352689	0.000227491	0.00029009
Decylcyclohexane	1795-16-0	1695	4.2	1.30811e-06	2.83647e-05	2.56217e-05	0.000149087	0.000236503	5.8465e-05	0.000147484
Undecylcyclohexane	54105-66-7	1716	3.81	8.07874e-07	1.48589e-05	2.05439e-06	4.11321e-05	0.00015619	2.31584e-05	8.96741e-05
Dodecylcyclohexane	1795-17-1	1717	2.78	7.42381e-07	8.58278e-06	6.24006e-05		0.000157897	1.8586e-05	8.82413e-05
Naphthalene	91-20-3	611	5.64	0.00308171	0.012362	1.2052e-07	0.00627764	0.00206232	0.000971877	0.0015171	0.00467994
2-methylnaphthalene	91-57-6	196	5.31	0.00117601	0.00356636	0	0.0063828	0.0025478	0.000452353	0.00150008
1-methylnaphthalene	90-12-0	105	5.36	0.000593442	0.00163521	0	0.00358475	0.00141324	0.000281435	0.000847336
C2-naphthalenes		1801	4.31	0.00064321	0.00135663	0		0.00398453	0.000639399	0.00231196
C3-naphthalenes		1706	4.31	0.000215107	0.000474971	0		0.00242523	0.000188706	0.00130697
C4-naphthalenes		1707	4.01	4.72549e-05	6.46602e-05	0		0.000286803	0	0.000143402
Acenaphthylene	208-96-8	847	4.48	0.000162386	0.000220316	0.00222262	0.000342546	0.000115771	0	5.78857e-05	0.000287556
Acenaphthene	83-32-9	846	4.23	1.7955e-05	6.35273e-05	0.00108057	0.000114478	4.42689e-05	0	2.21344e-05	0.000218924
Fluorene	86-73-7	883	3.82	3.99958e-05	0.000102146	0.000567719	0.000100727	8.14323e-05	0	4.07162e-05	0.000383118
C1-Fluorene	1730-37-6	885	3.43	3.46597e-05	7.81824e-05	0.000281675		0.00020611	0	0.000103055
n-Pentylbenzene	538-68-1	606	6.49	7.75325e-05	7.39277e-05	0.0177025		0.000266102	0.000143822	0.000204962
n-Hexylbenzene	1077-16-3	602	5.91	3.23424e-05	6.32094e-05	0.00759293		0.000196073	0	9.80365e-05
n-Heptylbenzene	1078-71-3	3405	5.59241	9.0911e-06	1.76383e-05	0.00322342		0.000233566	0	0.000116783
Octylbenzene (or phenyloctane)	2189-60-8	2802	5.14057	2.01897e-06	3.30922e-06	0.00141557		0.000109869	0	5.49347e-05
Nonylbenzene	1081-77-2	3406	4.36235	7.82038e-07	1.5405e-06	0.00129037		6.97289e-05	0	3.48645e-05
Decylbenzene	104-72-3	3407	3.77367	5.27624e-07	1.39379e-06	0.000843421		4.25503e-05	0	2.12751e-05
Undecylbenzene	6742-54-7	3408	3.15591	3.11123e-07	1.0759e-06	0.000816378		3.45423e-05	0	1.72711e-05
Dodecylbenzene	123-01-3	3409	2.50819	1.7032e-07	9.69944e-07	0.000537721		2.06888e-05	0	1.03444e-05
9-Fluorenone	486-25-9	881	2.5				0.000206326
1,4-dimethyl naphthalene	571-58-4; 571-61-9; 581-40-8	871	4.81				0.000380705
1,2-dimethyl naphthalene	573-98-8	877	4.76				0.000247592
1,7-dimethyl naphthalene	575-37-1	875	5.27				0.000811994
2,6-dimethyl naphthalene	581-42-0; 582-16-1	879	5.89				0.00107556

## Sheet: Table S4
Table S4. GROC-compatible VOC Speciation Profiles (in weight percent). Data are normalized to Total Organic Gas which includes methane.
Species ID	Name	CAS	SMILES	100GROC	101GROC	102GROC	103GROC	104GROC	105GROC	106GROC	107GROC	108GROC	109GROC	110GROC	111GROC	112GROC	113GROC	114GROC	115GROC	116GROC	117GROC	118GROC	119GROC	120GROC	121GROC	122GROC
1	(1-methyl-propyl) benzene	135-98-8	CCC(C)C1=CC=CC=C1	0.00823998	0.00766893	0.0246613	0.0229566							0.00322342	0.00312109		0.0423861					0.0478748
3	(2-methyl-propyl) benzene	538-93-2	CC(C)CC1=CC=CC=C1	0.0164104	0.0152732	0	0		0.115958	0.0602121				0.0693361	0.0533606	0.0491454	0.0352811	0.133385	0.0180698						0.104183	0.0783182
13	1,1,3-trimethylcyclopentane	4516-69-2	CC1CCC(C1)(C)C													0.0221166	0.0243166
19	1,1-dimethylcyclohexane	590-66-9	CC1(CCCCC1)C	0.0466852		0.0394558
20	1,1-dimethylcyclopentane	1638-26-2	CC1(CCCC1)C		0.0089778		0.007589							0.00841039	0.00281941	0.00306973	0.00302887
21	1,1-Methylethylcyclopentane	16747-50-5	CCC1(CCCC1)C											0.0179775	0.0182911	0.00056735	0.00148576
22	1,2,3,4-tetramethylbenzene	488-23-3	CC1=C(C(=C(C=C1)C)C)C	0.0818987	0.0780902	0.0692163	0.0660102							0.0676086	0.0672439	0.00143847	0.0388333
23	1,2,3,5-tetramethylbenzene	527-53-7	CC1=CC(=C(C(=C1)C)C)C	0.0767246	0.0714074	1.14634	1.0671	0.0752524	0.0889863					0.012476	0.0111724	0.0830331	0.0468212	0.0831488	0.0228303						0.0649449	0.0488216
25	1,2,3-trimethylbenzene	526-73-8	CC1=C(C(=CC=C1)C)C	0.283468	0.263823	0	0	0.0542534	0.032972	2.35355	0.00953863			0.020185	0.0616892	0.215252	0.15658					0.248949		0.0875809
27	1,2,3-trimethylcyclopentane	2815-57-8	CC1CCC(C1C)C	0.0372671	0.0346844	0.160174	0.149102
28	1,2,4,5-tetramethylbenzene	95-93-2	CC1=CC(=C(C=C1C)C)C	0.0528201	0.0491595	0	0	0.0360863	0.0438952	0.649935				0.121547	0.136028	0.013827	0.00845101
29	1,2,4-triethylbenzene	877-44-1	CCC1=CC(=C(C=C1)CC)CC											0.0231658	0.0202326	0.000684119
30	1,2,4-trimethylbenzene	95-63-6	CC1=CC(=C(C=C1)C)C	1.26652	1.17875	1.87935	1.74945	0.0228975	0.427362	0.0930941	0.00953863	0.0126984	0.010732	2.0279	1.9305	1.33083	1.23633	0.285003	0.0175825			1.37879	0.244497	0.289182	0.222606	0.167342
31	1,2,4-trimethylcyclopentane	2815-58-9	CC1CC(C(C1)C)C	0.0785589	0.0731146	0	0
33	1,2-butadiene	590-19-2	CC=C=C	0.0361923	0.0336841	0	0	0	0
36	1,2-diethyl-benzene	135-01-3	CCC1=CC=CC=C1CC	0.00641333	0.00596887	0	0							0.0853763	0.0734754	0.0261743						0.287249
37	1,2-dimethyl-3-ethylbenzene	933-98-2	CCC1=CC=CC(=C1C)C	0.0662317	0.0616417	0.0413654	0.0385061							0.00547414	0.00394875				0.0131287
39	1,2-dimethyl-4-ethyl-benzene	934-80-5	CCC1=CC(=C(C=C1)C)C	0.0668088	0.0621788	0	0							0.0346468	0.0265157	0.119958	0.0904314	0.0297407	0.0517169						0.0232295	0.0174625
42	1,2-propadiene	463-49-0	C=C=C	0.137368	0.127848	0.160071	0.149006	0.0687579	0.00775848													0.105324
43	1,3,5-triethylbenzene	102-25-0	CCC1=CC(=CC(=C1)CC)CC											0.0233691	0.0177181
44	1,3,5-trimethylbenzene	108-67-8	CC1=CC(=CC(=C1)C)C	0.427468	0.397844	0	0	0.0457207			0.0190773	0.0647249	0.0547019	0.726994	0.695482	0.415793	0.546686	0.33198				1.15857	0.0722379	0.0446167	0.259299	0.194925
45	1,3,5-trimethylcyclohexane	1839-63-0	CC1CC(CC(C1)C)C	0.0198372	0.0184624	1.52034	1.41525
46	1,3-butadiene	106-99-0	C=CC=C	0.399477	0.371793	0.0800008	0.0744709	0.381926	0.0562445			0.0589906	0.0498556	0.201351	0.255356	0.977194	0.975047	0.140113	0.14009	0.138938	0.0347482		0.0861298	1.39386	0.109438	0.0822689
47	1,3-butadiyne	460-12-8	C#CC#C	0.00304061	0.00282989	0	0
48	1,3-cyclopentadiene	542-92-7	C1C=CC=C1		0.112215		0.0948563		0.0105315			0.0257195	0.0217367	0.113425	0.116663	0.333249	0.375274		0.00667461
51	1,3-diethyl-benzene	141-93-5	CCC1=CC(=CC=C1)CC	0.0448452	0.0417374	0.257506	0.239707	0.0746151						0.167327	0.162738	0.061436	0.0613267					0.220224
52	1,3-dimethyl-2-ethylbenzene	354381	CCC1=C(C=CC=C1C)C	0.0355324	0.0330699	0	0							0.0167874	0.0133373	0.0600224	0.0239399
53	1,3-dimethyl-4-ethyl-benzene	874-41-9	CCC1=C(C=C(C=C1)C)C	0.0714337	0.0664832	0	0							0.0763754	0.00745069	0.0329611	0.0887134
54	1,3-dimethyl-4-isopropylbenzene	4706-89-2	CC1=CC(=C(C=C1)C(C)C)C													0.0243747	0.0565674
55	1,3-dimethyl-5-ethylbenzene	934-74-7	CCC1=CC(=CC(=C1)C)C	0.178313	0.165955	0	0
59	1,4-diethyl-benzene	105-05-5	CCC1=CC=C(C=C1)CC	0.0288403	0.0268416	0	0	0.0990471						0.396151	0.377759	0.0190498		0.368114	0.0171275						0.287522	0.216142
60	1,4-dimethyl-2-ethylbenzene	1758-88-9	CCC1=C(C=CC(=C1)C)C	0.0777048	0.0723197	0.418511	0.389582		0.0694513					0.242104	0.231408	0.0548024	0.0621201	0.0707865	0.00237367						0.0552891	0.041563
63	1-(1,1-dimethylethyl)-3,5-dimethylbenzene	98-19-1	CC1=CC(=CC(=C1)C(C)(C)C)C						0.0726015					0.112419	0.131055	0.00214769	0.000696899	0.256693	0.0613529						0.200494	0.15072
64	1-butene	106-98-9	CCC=C	0.482953	0.449483	0	0	0.516511	0.0176043			0.15705	0.13273	0.113545	0.122985	0.346224	0.415525		0.224477			1.06282		1.44922
65	1-butyne	107-00-6	CCC#C	0.00683399	0.00636039	0	0	0	0
71	1-ethyl-2-npropylbenzene	16021-20-8	CCCC1=CC=CC=C1CC	0.00449449	0.00418302	0.0759019	0.0706553
76	1-heptene	592-76-7	CCCCCC=C	0.00639857	0.00595513	0	0	0.166331
78	1-hexene	592-41-6	CCCCC=C	0.0312582	0.029092	1.24838	1.16208		0.00587047			0.00236403	0.00199795	0.0898311	0.104707	0.0320509	0.0934783	0.484995	0.308778	0.110609		0.268099		0.608109	0.378814	0.28477
80	1-methyl-2-ethyl-benzene	611-14-3	CCC1=CC=CC=C1C	0.321631	0.299341	0	0	0.0855153	0.0309225	0.0123326	0.00953863			0.594263	0.476314	0.321945	0.322223	0.214175	0.00247064					0.0537053	0.167285	0.125755
81	1-Methyl-2-isopropylbenzene	527-84-4	CC1=CC=CC=C1C(C)C	0.0388802	0.0361857	0	0		0.0368823					0.0629582	0.0490559	0.170209	0.254351	0.289958	0.0785637						0.226477	0.170252
84	1-Methyl-2-n-propylbenzene	1074-17-5	CCCC1=CC=CC=C1C	0.0381075	0.0354666	0.262829	0.244662							0.0353105	0.0271997	0.0366958	0.0887751
86	1-Methyl-2-tert-butylbenzene	1074-92-6	CC1=CC=CC=C1C(C)(C)C	0.0315099	0.0293262	0	0							0.124416	0.151559	0.00344048	0.0287097	0.264775	0.0310316						0.206807	0.155465
89	1-Methyl-3-ethylbenzene	620-14-4	CCC1=CC=CC(=C1)C	0.801401	0.745863	0.0233832	0.0217669	0.0509531	0.0445192		0.00953863	0.00817484	0.00690893	1.75251	1.47899	0.973273	0.872905	0.31259	0.0110505			0.153199	0.058346	0.12724	0.244154	0.18354
90	1-Methyl-3-isopropylbenzene	535-77-3	CC1=CC(=CC=C1)C(C)C	0.0168276	0.0156615	0.366981	0.341614		0.0284808					0.038132	0.0256201	0.271291	0.2131		0.0598982
92	1-Methyl-3-propylbenzene	1074-43-7	CCCC1=CC=CC(=C1)C	0.106647	0.0992563	0.0282547	0.0263016		0.0086043					0.213014	0.177376	0.121807	0.222077					0.153199
94	1-Methyl-4-ethylbenzene	622-96-8	CCC1=CC=C(C=C1)C	0.384251	0.357621	0	0	0.0430443						0.745093	0.614411	0.399356	0.285826	0.182917					0.144476	0.052879	0.14287	0.107401
95	1-Methyl-4-ethylcyclohexane	6236-88-0	CCC1CCC(CC1)C	0.00761894	0.00709094	0.0788013	0.0733543
97	1-Methyl-4-isopropylbenzene	99-87-6	CC1=CC=C(C=C1)C(C)C	0.00542439	0.00504847	0.38588	0.359207
100	1-Methyl-4-n-propylbenzene	1074-55-1	CCCC1=CC=C(C=C1)C	0.045751	0.0425804	0	0							0.0422353	0.0225197	0.110413	0.056084	0.188805	0.00873724						0.14747	0.110859
103	1-Methylcyclopentene	693-89-0	CC1=CCCC1	0.00549819	0.00511716	0	0					0.0137291	0.0116031	0.107579	0.160659	0.0135959	0.0609434	0.26197				0.0287249			0.204616	0.153818
104	1-Methylindan	767-58-8	CC1CCC2=CC=CC=C12					0.030874
105	1-Methylnaphthalene	90-12-0	CC1=CC=CC2=CC=CC=C12	0.0509411	0.049042	0.140367	0.135134	0.141324	0.0136102	0.0281435	0.0138331	0.0356176	0.0981433	0	0	0	0	0.0832609	0.078726	0.0777177	0.0488759	0.0578903	0.0281435	0.358475	0.138059
106	1-nonene	124-11-8	CCCCCCCC=C	0.0124364	0.0115745	0	0			0.0328734	0.00953863			0.168432	0.0664794	0.104685	0.0231074	0.582377	0.0691412					0.203254	0.454876	0.341948
107	1-octene	111-66-0	CCCCCCC=C	0.0113932	0.0106036	0	0				0.00953863													0.228041
108	1-pentene	109-67-1	CCCC=C	0.0802236	0.074664	0	0	0.221754	0.00296159		0.00953863			0.165855	0.215071			0.952519	0.410854	0.165913		0.392573		0.641158	0.743982	0.559281
109	1-propyne	74-99-7	CC#C	0.109994	0.102371	0	0	0	0					0.0219622	0.0181455	0.00345814						0.229799
112	2,2,3-trimethylbutane	464-06-2	CC(C)C(C)(C)C	0.00625834	0.00582463	0.665222	0.61924							0.0561962	0.066038	0.0235786	0.0435308	0.498131	0.00336344						0.389074	0.292482
113	2,2,3-trimethylpentane	564-02-3	CCC(C)C(C)(C)C		0.153355		0.129633							0.90935	1.01387	0.404559	0.286728		0.192514
116	2,2,4-trimethylheptane	14720-74-2	CCCC(C)CC(C)(C)C	0.0344664	0.0320778	0	0
117	2,2,4-trimethylhexane	16747-26-5	CCC(C)CC(C)(C)C	0.00843039	0.00784615	0	0							0.0247881	0.0186329	0.00427154
118	2,2,4-trimethylpentane	540-84-1	CC(C)CC(C)(C)C	2.44738	2.27778	0.36071	0.335777	0.286134	0.21299	0.191541		0.404755	0.342077	7.68201	12.2764	3.61166	4.50329	0.585805	0.488072	0.542696		1.43624	0.344519		0.457554	0.343961
120	2,2,5-trimethylheptane	20291-95-6	CCC(C)CCC(C)(C)C	0.0425896	0.039638	0	0
121	2,2,5-trimethylhexane	3522-94-9	CC(C)CCC(C)(C)C	0.372093	0.346306	0	0	0.0621784	0.0201584					0.558151	0.0394393	0.295625	0.0484505		0.0311354			0.229799
122	2,2-dimethylbutane	75-83-2	CCC(C)(C)C	0.223394	0.207912	0	0	0.0466027		1.24358	0.00953863	0.0220173	0.0186078	0.0876123	0.0673232	0.0282214	0.0394352	0.0265047	0.126909			0.210649	0.0861298		0.020702	0.0155625
124	2,2-dimethylhexane	590-73-8	CCCCC(C)(C)C	0.00926397	0.00862196	0.623188	0.580111		0.378756					0.0958438	0.0852624	0.00432093	0.00732843
125	2,2-dimethyloctane	15869-87-1	CCCCCCC(C)(C)C	0.0174951	0.0162827	0	0		0.000655543	0.156052				0.0900125	0.053568	0.0536282	0.0269322	0.338512	0.0129632						0.264401	0.198761
126	2,2-dimethylpentane	590-35-2	CCCC(C)(C)C	0.0480664	0.0447353	0.0160699	0.0149591		0.00889964			0.0328059	0.0277258	0.407284	0.589977	0.0583767	0.207016	0.0138581	0.0425036	0.0402458					0.0108241	0.00813693
127	2,2-dimethyl-propane	463-82-1	CC(C)(C)C	0.0154028	0.0143354	0	0	0	0			0.077443	0.0654506	0.0823799	0.0679544				0.0623585
128	2,3,3-trimethylpentane	560-21-4	CCC(C)(C)C(C)C	0.00639119	0.00594827	0	0		0.29701			0.12022	0.101604	1.4013	0.201175	0.580609	0.103352	0.0583103	0.306372	0.28172		0.402148			0.0455443	0.0342375
129	2,3,4-trimethylhexane	921-47-1	CCC(C)C(C)C(C)C											0.0191517	0.0197022
130	2,3,4-trimethylpentane	565-75-3	CC(C)C(C)C(C)C	0.573447	0.533706	0.937609	0.872799	0.0352446	0.305153			0.00494297	0.00417753	2.32578	0.642094	0.893866	0.208303	0.18817	0.0486038	0.340414		0.248949	0.0861298		0.146974	0.110486
132	2,3,5-trimethylhexane	1069-53-0	CC(C)CC(C)C(C)C	0.0426657	0.0397089	0	0							0.0880623	0.0361012	0.046285	0.0110784					0.0765996
133	2,3-dimethyl-1-butene	563-78-0	CC(C)C(=C)C	0.0170758	0.0158924	0	0
135	2,3-dimethyl-2-pentene	10574-37-5	CCC(=C(C)C)C	0.00422143	0.00392888	0	0	0.00257183
136	2,3-dimethylbutane	79-29-8	CC(C)C(C)C	0.547923	0.509951	0	0	0.0737118	0.0499745			0.180905	0.152891	0.71022	0.521292	0.37281	0.186504		0.116985			0.938345	0.158368
137	2,3-dimethylheptane	3074-71-3	CCCCC(C)C(C)C	0.0133323	0.0124084	0	0							0.0175191	0.0236119
138	2,3-dimethylhexane	584-94-1	CCCC(C)C(C)C	0.227651	0.211874	0	0	0.00734064							0.124559	0.132707	0.0109205		0.235023				0.0444541
139	2,3-dimethyloctane	7146-60-3	CCCCCC(C)C(C)C	0.0173225	0.016122	0	0															0.497897
140	2,3-dimethylpentane	565-59-3	CCC(C)C(C)C	1.07172	0.997445	0	0	0.0852201	0.199957					0.603847	0.00141656	1.79183	1.35867	0.0663406	0.103597	0.218075			0.200043		0.0518165	0.0389525
141	2,4,4-trimethyl-1-pentene	107-39-1	CC(=C)CC(C)(C)C	0.00415501	0.00386706	0	0					0.0050697	0.00428463	0.0869509	0.103272	0.00688684	0.0632585					1.65647
142	2,4,4-trimethyl-2-pentene	107-40-4	CC(=CC(C)(C)C)C	0.00506276	0.00471191	0	0		0.024425					0.0112893	0.0177876		0.0497899
143	2,4,4-trimethylhexane	16747-30-1	CCC(C)(C)CC(C)C	0.0152863	0.0142269	1.28856	1.19949
146	2,4-dimethyl-1-pentene	2213-32-3	CC(C)CC(=C)C	0.00362364	0.00337252	0	0
147	2,4-dimethyl-2-pentene	625-65-0	CC(C)C=C(C)C	0.0644151	0.059951	0	0
148	2,4-dimethylheptane	2213-23-2	CCCC(C)CC(C)C	0.031155	0.0289959	0.602409	0.560769			0.316452				0.0760963	0.0578472	0.0423903	0.0221018					0.0765996
149	2,4-dimethylhexane	116502-44-4	CCC(C)CC(C)C	0.397169	0.369644	0	0															0.402148	0.0138919		0.289537	0.217656
151	2,4-dimethyloctane	4032-94-4	CCCCC(C)CC(C)C	0.0417777	0.0388824	0.300212	0.279461			0.324685				0.0573142	0.0646467	0.00737323	0.0317208	0.397782	0.0401998						0.310695	0.233562
152	2,4-dimethylpentane	108-08-7	CC(C)CC(C)C	0.699496	0.65102	0.697246	0.64905	0.265826		0.750491	0.00953863	0.0194342	0.0164247	1.36709	0.913985	1.05025	0.315192	0.142952	0.326054	0.271519		0.612797	0.113914		0.111655	0.0839355
155	2,5-dimethylheptane	2216-30-0	CCC(C)CCC(C)C	0.142159	0.015121	0.120145	0.0127819							0.0864842	0.065218	0.0517611	0.0308546	0.164531	0.027436			0.124474			0.12851	0.0966061
156	2,5-dimethylhexane	592-13-2	CC(C)CCC(C)C	0.314164	0.292392	0	0							0.00229302									0.0138919
158	2,5-dimethyloctane	15869-89-3	CCCC(C)CCC(C)C	0.0147638	0.0137406	0.157347	0.146471
160	2,6-dimethylheptane	1072-05-5	CC(C)CCCC(C)C	0.0351454	0.0327098	0	0		0.116003	0.425839				0.00430474	0.00647335			0.406128	0.129566	0.0740506					0.317213	0.238462
162	2,6-dimethyloctane	2051-30-1	CCC(C)CCCC(C)C	0.00527679	0.0049111	0	0															0.0670247
170	2-butyne	503-17-3	CC#CC	0.000425833	0.000396322	0	0	0	0
181	2-methyl-1-butene	563-46-2	CCC(=C)C	0.167478	0.155871	0	0	0.0619042	0					0.281117	0.426257			0.199381	0.132279	0.424911			0.0722379	0.115673	0.15573	0.117068
184	2-methyl-1-pentene	763-29-1	CCCC(=C)C	0.00917696	0.00854098	0	0	3.09793	0.00586838		0.0190773	0.00236403	0.00199795	0.100298	0.123815	0.0320373	0.0934639	0.484995	0.308778	0.110609				0.028092	0.378814	0.28477
185	2-methyl-2-butene	513-35-9	CC=C(C)C	0.200102	0.186234	0	0	0.127519		1.56305	0.00953863	0.0506228	0.0427836	0.566794	0.730109	0.192514	0.229941		0.0730559	0.221217		0.105324		0.152853
186	2-methyl-2-hexene	2738-19-4	CCCC=C(C)C	0.0115222	0.0107237	0.00671287	0.00624885							0.10242	0.127613		0.0126472
187	2-methyl-2-pentene	625-27-4	CCC=C(C)C	0.0163148	0.0151841	0	0	0.0135153	0.0167674			0.0123939	0.0104746	0.126937	0.177642	0.0353242	0.0683324					0.325548	0.058346
188	methacrolein	78-85-3	CC(=C)C=O	0.405277	0.377191	0	0	1.27356	2.7409														1.11135	0.354455
190	2-methyl-trans-3-hexene	692-24-0	CCC=CC(C)C	0.0147309	0.01371	0	0
192	2-methyldecane	6975-98-0	CCCCCCCCC(C)C																			0.603222
193	2-methylheptane	592-27-8	CCCCCC(C)C	0.338597	0.315132	0	0	0.067621				0.0573752	0.0484904	0.749415	0.530043	0.208183	0.197983					0.248949	0.0277838
194	2-methylhexane	591-76-4	CCCCC(C)C	0.792647	0.737715	0.0193304	0.0179942	0.0770862		0.213855		0.229444	0.193914	2.51442	4.84706								0.158368
195	2-methylindan	824-63-5	CC1CC2=CC=CC=C2C1	0.0324241	0.0301771	1.13297	1.05466	0.0187292
196	2-methylnaphthalene	91-57-6	CC1=CC2=CC=CC=C2C=C1	0.100949	0.0971855	0.306137	0.294724	0.25478	0.0218758	0.0452353	0.0274128	0.0705826	0.214048	0	0	0	0	0.147401	0.139372	0.137587	0.0968563	0.11472	0.0452353	0.63828	0.248895
197	2-methylnonane	871-83-0	CCCCCCCC(C)C	0.239173	0.222598	0	0
198	2-methyloctane	3221-61-2	CCCCCCC(C)C	0.00149078	0.00138747	0	0			0.1009				0.595103	0.453438	0.175696	0.156373	0.842452	0.144629			0.0382998			0.658012	0.494654
199	2-methyl-pentane	107-83-5	CCCC(C)C	1.58953	1.47937	4.0022	3.72556	0.0429049	0.0768098	0.305012		0.28726	0.242776	1.67569	2.24195	0.318003	0.74866	0.110047	0.204457	0.163366		2.69056	0.258389	0.337104	0.0859539	0.064615
203	3,3-dimethyl-1-butene	558-37-2	CC(C)(C)C=C	0.00622144	0.00579029	0	0							0.00945483	0.00960265	0.0172565	0.036667
205	3,3-dimethylheptane	4032-86-4	CCCCC(C)(C)CC	0.0311413		0.0263189								0.0306421	0.036096
206	3,3-dimethylhexane	563-16-6	CCCC(C)(C)CC	0.00419929	0.00390827	0	0							0.0824888	0.0780665	0.0242567	0.0421233
207	3,3-dimethyloctane	4110-44-5	CCCCCC(C)(C)CC	0.0166036	0.0154529	0	0
208	3,3-dimethylpentane	562-49-2	CCC(C)(C)CC	0.0444987	0.0414149	0	0		0.00265165					0.0930729	0.0393811	0.0249916	0.00673509
209	3,4-dimethyl-1-pentene	7385-78-6	CC(C)C(C)C=C	0.00305537	0.00284363	0	0		0.0377598					0.0163697	0.0205392	0.00797344	0.0123177		0.0108789
211	3,4-dimethylheptane	922-28-1	CCCC(C)C(C)CC											0.0412839	0.0279805
212	3,4-dimethylhexane	583-48-2	CCC(C)C(C)CC	0.0609204	0.0566985	0	0			0.111995				0.0838448	0.0690296	0.0369531	0.00893227
215	3,5-dimethylheptane	926-82-9	CCC(C)CC(C)CC	0.0963902	0.0897102	0.369599	0.344051							0.0864842	0.065218	0.0517677	0.0308693	0.164531	0.027436						0.12851	0.0966061
221	3-ethyl-2-pentene	816-79-5	CCC(=CC)CC	0.0011882	0.00110586	0	0		0.00564584	0.260366				0.00971967	0.0116851
226	3-ethylhexane	619-99-8	CCCC(CC)CC		0.0226519		0.0191478		0.0443773									0.0832113	0.0183389				0.058346		0.0649937	0.0488583
229	3-ethylpentane	617-78-7	CCC(CC)CC	0.117931	0.109759	0	0							0.207348	0.315762	0.0254032	0.0965946
230	3-methyl-1-butene	563-45-1	CC(C)C=C	0.0514222	0.0478585	0	0	0.0520593	0			0.0446957	0.0377744	0.191928	0.122947	0.0401216	0.0764879					0.134049	0.0444541	0.0925383
231	3-methyl-1-hexene	3404-61-3	CCCC(C)C=C	0.000625834	0.000582463	0.448751	0.417732							0.0185112	0.019102
232	3-methyl-1-pentene	760-20-3	CCC(C)C=C	0.0153057	0.014245	0	0					0.0353702	0.029893	0.0773865	0.0851453	0.029633	0.0402868
233	3-methyl-3-ethylpentane	1067-08-9	CCC(C)(CC)CC											0.0838448	0.0690284	0.0369531	0.00893227
235	3-methyl-cis-2-hexene	10574-36-4	CCCC(=CC)C	0.00236902	0.00220484	0	0
236	3-methyl-cis-2-pentene	922-62-3	CCC(=CC)C	0.0778271	0.0724335	0	0	0.00995017				0.0199493	0.0168601	0.15101	0.22696	0.0307583	0.0646642		0.0117511
239	3-methyl-trans-2-pentene	616-12-6	CCC(=CC)C	0.00591148	0.0055018	0.108255	0.100772	0.120829						0.190701	0.264109	0.0355433	0.0880684
240	3-methyl-trans-3-hexene	3899-36-3	CCC=C(C)CC	0.0014096	0.00131192	0	0
242	3-methylcyclopentene	1120-62-3	CC1CCC=C1	0.00771016	0.00717583	0	0							0.00289878	0.00321188	0.00327383	0.0177667
244	3-methylheptane	589-81-1	CCCCC(C)CC	0.3787	0.352455	1.15203	1.0724	0.0591997	0.0400355		0.0190773	0.0601883	0.0508678	1.16162	0.699638	0.258169	0.22147		0.0164832	0.142945		0.335123
245	3-methylhexane	589-34-4	CCCC(C)CC	0.803516	0.747831	0	0	0.14225	0.0839853	0.134934	0.00953863	0.122896	0.103865	1.52319	1.3055	0.181595	0.389831	0.0754194	0.0696359				0.0861298		0.0589077	0.0442832
247	3-methyloctane	2216-33-3	CCCCCC(C)CC	0.175786	0.163604	0	0	0.154827		0.0810617				0.421242	0.29992	0.109306	0.090862	0.449071	0.0532035	0.148101		0.296824			0.350755	0.263676
248	3-methylpentane	96-14-0	CCC(C)CC	1.02842	0.957147	2.03724	1.89642		0.0781773		0.0190773	0.245208	0.207237	1.03147	1.49257	0.19299	0.513118	0.414606	0.521235	0.0276522		1.47454	0.186151		0.323835	0.24344
253	4,4-dimethylheptane	1068-19-5	CCCC(C)(C)CCC						0.091206					0.0925005	0.0694829	0.00406192	0.00891714
257	4-methyl-1-hexene	3769-23-1	CCC(C)CC=C	0.0225141		0.0190277
258	4-methyl-1-pentene	691-37-2	CC(C)CC=C	0.00860773	0.0080112	0	0		0.0315866					0.0011564	0.0188594			0.196881	0.0373733	0.28665				0.0570102	0.153778	0.115601
260	4-methyl-cis-2-pentene	691-38-3	CC=CC(C)C	0	0	0	0
261	4-methyl-trans-2-hexene	3683-22-5	CCC(C)C=CC	0.00333582	0.00310464	0	0
262	4-methyl-trans-2-pentene	674-76-0	CC=CC(C)C	0.0108965	0.0101413	0	0							0.0632586	0.078756	0.00496874
264	4-methylheptane	589-53-7	CCCC(C)CCC	0.13053	0.121484	0.496888	0.462542	0.0194761						0.705298	0.169881	0.0568728	0.0329315	0.234155	0.0186288			0.239374			0.182891	0.137486
267	4-methyloctane	2216-34-4	CCCCC(C)CCC	0.200121	0.186252	0	0															0.373423
279	Acetaldehyde	75-07-0	CC=O	5.86374	5.45737	0.801448	0.746049	3.72369	5.23054	1.78984	0.0286159	8.84282	7.47347	0.0973326	0.316268	0.334641	0.708611	5.40382	5.37399	7.0997	0.434693		11.6136	3.52968	0.411509	0.309347
281	Acetone	67-64-1	CC(=O)C	1.16514	1.08439	0.174805	0.162722	1.10941	0.918972	0.524369		0.358297	0.302813	0.0378717	0.0468853	0.237765	0.19504	1.42505	0.784726					0.304881	1.11306	0.836731
282	Acetylene (or ethyne)	74-86-2	C#C	1.37242	1.27731	0.435728	0.405609	0.998347	0.0156973	0.427295	0.305236	0.754971	0.638061	2.99422	2.59431	12.9401	12.4621	2.18754	2.56382	0.833286	0.11573	2.54694	1.27806	3.25454	1.70862	1.28444
283	Acrolein (or 2-propenal)	107-02-8	C=CC=O	0.615912	0.573228	0	0	0.941012	0.00237939	0.154422		0.0486384	0.0411065	0.0294121	0.0417752	0.0293271	0.035517	2.19623	1.10424	1.26601	0.479272		0.944649	2.02345	1.7154	1.28954
301	Benzaldehyde	100-52-7	C1=CC=C(C=C1)C=O	0.976659	0.908974	0.829591	0.772247	0.529528	0.0510062	0.0160842		0.0423146	0.035762	0.102616	0.0628315	0.408769	0.204274	0.262505	0.672915	0.52381			1.05578	0.38833	0.205034	0.154132
302	Benzene	71-43-2	C1=CC=CC=C1	2.70825	2.52057	5.51065	5.12974	0.485332	0.266157		0.104925	0.917134	0.775111	1.31727	1.18789	5.40976	3.60875	1.41192	1.48379	3.78602		1.67562	0.761276	1.3889	0.19934	0.149851
313	Butyraldehyde (or butanal)	123-72-8	CCCC=O	0.14735	0.137138	0.00103539	0.000963819	0.299111	0.131341	0.0580697		0.00531768	0.00449421										0.361189	0.098322
315	C10 aromatics	0	0																					0.54201
327	C9-c12 isoalkanes	90622-57-4	CCCCCCCCC(C)C		1.81841		1.53712			0.785838				3.73048	3.43619	1.01763	1.48327	3.76522	0.525239	4.53458					2.94089	2.21079
351	Cis-1,2-dimethylcyclohexane	112134	C[C@@H]1CCCC[C@@H]1C	0.0200131	0.0186262	0	0							0.106628	0.096066	0.0340416	0.0347539
352	Cis-1,3-dimethylcyclohexane	638-04-0	CC1CCCC(C1)C	0.1149	0.106937	0	0
353	Cis-1,3-dimethylcyclopentane	2532-58-3	CC1CCC(C1)C	0.109329	0.101752	1.25515	1.16839			0.238082				0.0658227	0.018461	0.020425	0.0844677	0.173522	0.0262137						0.135533	0.101885
354	Cis-1,4-dimethylcyclohexane	624-29-3	CC1CCC(CC1)C	0.0410981	0.03825									0.0250457	0.0261695	0.00109892	0.00682156					0.0765996
357	Cis-1,trans-2,3-trimethylcyclopentane	15890-40-1	CC1CCC(C1C)C		0.0558315		0.0471948							0.139678	0.150935	0.0339258	0.0495643
358	Cis-1,trans-2,4-trimethylcyclopentane	16883-48-0	CC1CC(C(C1)C)C							0.029998
362	Cis-1-ethyl-2-methylcyclopentane	930-89-2	CCC1CCCC1C											0.082002	0.0633363	0.00957564	0.0157603	0.0265047							0.020702	0.0155625
364	Cis-1-ethyl-3-methylcyclopentane	2613-66-3	CCC1CCC(C1)C	0.0748082	0.0696238	0.508156	0.47303							0.0455222	0.056226	0.0171024	0.0385627	0.463345	0.185699						0.361904	0.272058
367	Cis-2-butene	590-18-1	CC=CC	0.215167	0.200256	0	0	0.061281	0	0.272709	0.0190773	0.403067	0.34065	0.0743351	0.100078	0.172125	0.186632					0.641522	0.0722379	0.173509
368	Cis-2-heptene	6443-92-1	CCCCC=CC	0.00888301	0.0082674	0	0							0.0495735	0.0549603	0.015529	0.0210016		0.132152
369	Cis-2-hexene	7688-21-3	CCCC=CC	0.0112602	0.0104799	0	0	0.0226812				0.0126682	0.0107065	0.0737717	0.0920085	0.023039	0.0197742					0.105324	0.0277838
370	Cis-2-octene	2097322	CCCCCC=CC	0.0253884	0.023629	0.661919	0.616165							0.0730299	0.0121801
371	Cis-2-pentene	627-20-3	CCC=CC	0.0671193	0.0624678	0	0	0	0	0.0863621		0.025175	0.0212765	0.208427	0.270968	0.0965999	0.137128		0.0176998			0.92877		0.228041
372	Cis-3-hexene	2097470	CCC=CCC	0.00179337	0.00166909	0	0							0.0889916	0.111771	0.00527946	0.0266262		0.018629
373	Cis-3-nonene	20237-46-1	CCCCCC=CCC											0.00647974	0.00601007
382	crotonaldehyde	4170-30-3	CC=CC=O	0.155805	0.145007	0	0	0	0.176126	0.0113511				0.0185008	0.0227176	0.0289094	0.0234708	1.46066	2.89546	2.35635			3.72303	0.853501	1.14088	0.857641
385	Cyclohexane	110-82-7	C1CCCCC1	0.288829	0.268813	0	0	0.131218			0.00953863	0.00362759	0.00306584	0.0508945	0.073122	0.0505419	0.508443	0.0689122					0.058346		0.0538251	0.0404625
388	Cyclohexene	110-83-8	C1CCC=CC1	0.0994846	0.0925902	0.0204064	0.0189958	0.0557196		0.451503				0.0268196	0.0358263	0.114206	0.04391	0.295556	0.0863473			1.51284			0.230849	0.173538
390	Cyclopentane	287-92-3	C1CCCC1	0.141445	0.131643	1.01772	0.94737	0.0420949			0.0190773	0.065409	0.0552801	0.0720593	0.100432	0.0350122	0.0536036	0.152157	0.0282035			0.459598	0.113914		0.118845	0.0893403
391	Cyclopentene	142-29-0	C1CC=CC1	0.0602239	0.0560502	0	0	0.066109	0.00623583			0.0395606	0.0334344	0.0875409	0.122758	0.0282291	0.0687318	0.0326772	0.027911			0.277674	0.058346		0.0255231	0.0191867
435	Dl-limonene	7705-14-8	CC1=CCC(CC1)C(=C)C					0.0129994
438	Ethane	74-84-0	CC	2.10382	1.95803	2.44637	2.27727	0.0433164	0.699849	5.24562	13.3541	3.37678	2.85387	0.238052	0.275856	0.88901	0.826499	0.0951701	0.350355		5.40106	0.660672		0.430468	0.0743343	0.0558801
442	Ethyl alcohol (or ethanol)	64-17-5	CCO	1.37352	3.17265	1.16083	2.68187					20.114	16.9993	0.0548235	7.36695	0.134221	2.3853
449	Ethylbenzene	100-41-4	CCC1=CC=CC=C1	0.875898	0.815197	0	0	0.142848	0.0157223	0.479518	0.00953863	0.295711	0.249919	3.26051	2.10827	1.71963	1.31288	0.684247	0.268171	0.288961		0.641522	0.130584	0.143765	0.534443	0.401762
450	Ethylcyclohexane	1678-91-7	CCC1CCCCC1	0.0235365	0.0219053	0.188816	0.175765							0.16883	0.102999	0.0215268	0.0233853
451	Ethylcyclopentane	1640-89-7	CCC1CCCC1	0.0118967	0.0110722	0	0									0.00186728	0.0108403
452	Ethylene (or ethene)	74-85-1	C=C	5.72469	5.32796	3.40963	3.17394	5.74229	1.99405	4.95609	0.600934	11.1294	9.40595	1.7304	1.86951	8.57944	9.68502	12.529	14.2538	13.7488	3.78648	4.1651	2.37829	12.7744	9.786	7.35652
465	Formaldehyde	50-00-0	C=O	7.26564	6.76211	2.19683	2.04498	8.33288	0.757666	1.14197	0.772629	1.51997	1.2846	0.347849	0.469216	1.54686	1.38567	14.9593	15.3108	19.8559	2.38692		6.19579	10.171	1.79595	1.35009
480	Hexylcyclohexane	4292-75-5	CCCCCCC1CCCCC1	0.00147694	0.00142188	0.00717085	0.00690353	0.0651867	0.0999189	0.206615	0.000401065	0.00103266	0.00501381	0.00206004	0.00205921	0.00176267	0.00177294	0.133539	0.126265	0.124648	0.00141706	0.00167842	0.206615		0.0636809
485	Indane	496-11-7	C1CC2=CC=CC=C2C1	0.12729	0.118468	0.410324	0.381961	0.0306263														0.306398
491	Isobutane (or 2-Methylpropane)	75-28-5	CC(C)C	0.0812233	0.0755944	3.18944	2.96897	0	0.047126	0.535209	0.410161	0.1683	0.142238	0.216302	0.015203	0.134034	0.0301804		0.33545	0.490098		3.28421
497	Isobutylene	115-11-7	CC(=C)C	1.00195	0.93251	0	0	0.257943	0.446713	6.91269	0.0190773	0.215991	0.182544	0.723622	0.98479	2.5566	2.94535	0.256443	0.555081				0.316735		0.2003	0.150573
500	Isomers of decane	0	0								0.0190773
507	Isomers of xylene	1330-20-7	Cc1ccccc1C		3.62367		3.06312				0.0190773	0.76703	0.648252
508	Isopentane (or 2-Methylbutane)	78-78-4	CCC(C)C	2.81603	2.62088	0	0	0.0346258	0.04914	0.455352		1.03927	0.878335	9.91282	5.93004	2.12826	1.39812		0.371045			10.5707	0.761276
511	Isoprene	78-79-5	CC(=C)C=C	0.0368481	0.0342945	0	0	0.066909				0.00250187	0.00211444	0.105659	0.138291	0.181791	0.251152	0.0692747	0.241773			0.0957495			0.0541082	0.0406753
513	Isopropyl alcohol	67-63-0	CC(C)O		0.530716		0.448618							0.0161519		0.0136715	0.00456991
514	Isopropylbenzene	98-82-8	CC(C)C1=CC=CC=C1	0.0381518	0.0355078	0.00876818	0.00816209	0.0137331		0.267495				0.104453	0.0599987	0.091785	0.0367228	0.278328	0.0550486					0.0024787	0.217393	0.163423
515	Isopropylcyclohexane	696-29-7	CC(C)C1CCCCC1	0.0223001		0.0188468		0.164478
517	Isovaleraldehyde	590-86-3	CC(C)CC=O						0.0465471	0.0131104		0.0099759	0.00843108	0.013398	0.0178918	0.0485486	0.0422981	0.507877	0.368379					0.0264395	0.396686	0.298205
522	M & p-xylene (or m,p-xylene)	108-38-3; 106-42-3	c1(cccc(c1)C)C	4.26472		3.60431		0.275903	0.593555	3.45214				6.09298	5.08602	3.44017	4.29789	1.1102	0.821865	0.796778				0.232998
524	M-xylene	108-38-3	CC1=CC(=CC=C1)C	2.02845	1.88788	2.62087	2.43971	0.274867	0.0180575		0.00953863											1.78094	0.647363		0.867145	0.651867
529	Methane	74-82-8	C	14.16	17.36	14.16	17.36	0	51.64	0	76.69	39.9813	39.9813	1.7	1.74	15.89	15.4	1.738	7.09	8.28	17.64	2.45	0	0	2.31	2.31
531	Methyl alcohol (or methanol)	67-56-1	CO		0.447099		0.377936							0.0738344	0.124636	0.161321	0.164716							1.49135
536	methylethyl-ketone	78-93-3	CCC(=O)C	0.188357	0.175304	0	0	0.124012	1.30135	0.0414725		0.00531768	0.00449421	0.00929981	0.00960308	0.0132459	0.0188751	0.464	0.531706	0.629355			2.08379		0.362416	0.272442
548	methyl-tert-butyl-ether	1634-04-4	CC(C)(C)OC	0	0	0	0
550	Methylcyclohexane	108-87-2	CC1CCCCC1	0.302728	0.281748	0	0	0.125466	0.509226	0.401586	0.0190773	0.04069	0.034389	0.415942	0.608096	0.0791364	0.220263	0.262098	0.192628			0.248949	0.144476		0.204716	0.153893
551	Methylcyclopentane	96-37-7	CC1CCCC1	0.876047	0.815335	0.488653	0.454876	1.95253	0.00872017		0.0381545	0.0323717	0.0273588	0.39907	0.57808	0.0572138	0.202849	0.0138581	0.0414937	0.0402458		1.06282	0.17226		0.0108241	0.00813693
592	N-butane	106-97-8	CCCC	0.450829	0.419585	0	0	0	0.0408326	0.0868637	0.953863	0.839547	0.70954	1.63185	1.12955	0.597566	0.480265	0.253183	0.731241	0.408415	0.136462	21.467	1.06412		0.197753	0.148659
595	N-butyl alcohol (or 1-Butanol)	71-36-3	CCCCO													0.0541202	0.0307652
596	N-butylbenzene	104-51-8	CCCCC1=CC=CC=C1					0.0228774						0.0287611	0.0225197	0.110413	0.056084	0.188805	0.00873724			0.201074			0.14747	0.110859
598	N-decane	124-18-5	CCCCCCCCCC	0.093096	0.0866442	0	0	0.440657	0.285261	0.0638302	0.00953863			0.0735024	0.056567	0.0520985	0.0373994	0.139061	0.0191909			0.105324		0.264395	0.108616	0.0816508
599	N-dodecane	112-40-3	CCCCCCCCCCCC	0.0190479	0.0183378	0.119181	0.114739	0.425367	0.818077	1.69164	0.00517249	0.0133181	0.0833308	0.0323941	0.0323809	0.0277179	0.0278793	1.04011	0.983455	0.970859	0.0182757	0.0216463	1.69164	0.636284	0.415541	0.515403
600	N-heptane	142-82-5	CCCCCCC	0.581306	0.541021	0.777009	0.7233	0.136574	0.158479	0.0487248	0.0190773	0.111082	0.0938803	1.11238	0.596015	0.249211	0.212492	0.197923	0.0696208			0.698971	0.130584	0.052879	0.154591	0.116212
601	N-hexane	110-54-3	CCCCCC	1.09754	1.02148	0	0	0.335305	0.134878	0.0375817	0.0190773	0.22933	0.193817	0.730703	0.675032	0.181564	0.411036	0.168681	0.184379			1.46497			0.131751	0.0990425
602	N-hexylbenzene	1077-16-3	CCCCCCC1=CC=CC=C1	0.00277627	0.00267278	0.00542589	0.00522362	0.0196073	0	0	0.000753901	0.00194115	0.00379375	0.746385	0.746081	0.638641	0.642362	0.00963326	0.00910857	0.00899191	0.00266372	0.003155	0		0.0191544
603	N-nonane	111-84-2	CCCCCCCCC	0.120519	0.112167	0	0	0.22213	0.0353264	1.41099	0.00953863			0.329867	0.15023	0.1629	0.0582825	1.67484	0.315038			0.105324	0.0444541	0.0512266	1.30816	0.983398
604	N-octane	111-65-9	CCCCCCCC	0.299834	0.279055	1.48644	1.38369	0.100695	0.017474	0.188713	0.0190773	0.0574887	0.0485863	0.4342	0.290864	0.212588	0.137841	0.563944	0.272637	0.17086		0.229799	0.0722379	0.0512266	0.440479	0.331125
605	N-pentane	109-66-0	CCCCC	1.03358	0.961948	0	0	0.342282	0.577712	1.58531	0.124002	0.873363	0.738119	0.816465	0.836775	0.319811	0.307379	0.0883738	0.512739	1.16457		4.65343	0.516779	0.163595	0.069026	0.0518895
606	N-pentylbenzene	538-68-1	CCCCCC1=CC=CC=C1	0.0066526	0.0064046	0.00634358	0.0061071	0.0266	0.00696384	0.0144	0.00180653	0.00465145	0.00443538	1.739	1.739	1.488	1.4974	0.0340548	0.0190465	0.0188026	0.0063829	0.00756013	0.0144		0.0265991	0.0199956
607	N-propyl alcohol (or 1-Propanol)	71-23-8	CCCO													0.0919856	0.0570914
608	N-propylbenzene	103-65-1	CCCC1=CC=CC=C1	0.15942	0.148372	0	0	0.0279688		0.375457		0.00353205	0.00298509	0.648114	0.458247	0.265157	0.2301	0.720552	0.0146564			0.296824	0.0277838	0.0437904	0.5628	0.423079
609	N-tridecane	629-50-5	CCCCCCCCCCCCC	0.013038	0.0125519	0.0702239	0.067606	0.471581	0.567379	1.17324	0.00354049	0.00911606	0.0491	0.0110177	0.0110132	0.00942722	0.00948214	0.808117	0.764102	0.754315	0.0125094	0.0148166	1.17324	0.341703	0.460688	0.585759
610	N-undecane	1120-21-4	CCCCCCCCCCC	0.0279294	0.0259938	0.0615336	0.0572801	0.494259	0.154391		0.00953863			0.110341	0.104318	0.029981	0.0307119	0.332192	0.199607	0.567721		0.134049		0.366848	0.259465	0.19505
611	Naphthalene	91-20-3	C1=CC=C2C=CC=CC2=C1	0.264534	0.254672	1.06115	1.02159	0.206232	0.047	0.0971877	0.0718346	0.18496	0.741948	1.18471e-05	1.18423e-05	1.01369e-05	1.0196e-05	0.149073	0.140954	0.139148	0.25381	0.300621	0.0971877	0.627764	0.201468	0.457184
620	O-xylene	95-47-6	CC1=CC=CC=C1C	1.14462	1.0653	1.65071	1.53661	0.119942	0.0118827	0.190242	0.00953863	0.235566	0.199088	2.19439	1.7552	1.14752	1.20489	0.524659	0.307624			0.871321	0.230606	0.137155	0.409794	0.308058
648	P-xylene	106-42-3	CC1=CC=C(C=C1)C	1.03454	0.962841	1.34544	1.25244
657	Pentylcyclohexane	4292-92-6	CCCCCC1CCCCC1																				0.0233106
663	Phenol (or carbolic acid)	108-95-2	C1=CC=C(C=C1)O																					0.726
671	Propane	74-98-6	CCC	0.706664	0.657691	0	0	0	1.20657	1.42718	2.77574	0.108195	0.0914407	0.0436079	0.0293913	0.257535	0.0682735	0.0472321	0.429636	0.110609	64.0997			0.0644463	0.0368915	0.0277328
673	propanal	123-38-6	CCC=O	0.38315	0.356597	0	0	0.466452	0.404344	0.124215		0.132794	0.112231	0.0477809	0.0492726	0.0390986	0.0328495	1.04258	2.67016	1.48258			3.88973	0.600673	0.814324	0.61216
677	Propylcyclopentane	2040-96-2	CCCC1CCCC1											0.0028965	0.00647286			0.406128	0.129566	0.0740506					0.317213	0.238462
678	propene	115-07-1	CC=C	2.91692	2.71477	2.09113	1.94659	2.12735	0.207126	2.2376	1.61203	0.757123	0.639879	1.10642	1.21968	5.07915	5.06593		2.84984		1.68514	1.50327	0.216714	3.74615
698	Styrene	100-42-5	C=CC1=CC=CC=C1	0.124996	0.116333	0.121538	0.113137	0.0241604	0			0.0194445	0.0164334	0.211253	0.166511	0.760819	0.561599							0.255307
703	T-butylbenzene	98-06-6	CC(C)(C)C1=CC=CC=C1											0.028827	0.0303292
716	m-Tolualdehyde	620-23-5	CC1=CC(=CC=C1)C=O																					0.278
717	Toluene	108-88-3	CC1=CC=CC=C1	4.4382	4.13062	4.57742	4.26101	0.297406	0.073407	0.786479	0.0381545	0.964377	0.815038	8.3543	7.50269	8.2914	7.44586	0.884145	1.47878	2.55623		2.85334	1.1058	0.530443	0.690578	0.519134
724	Trans-1,2-dimethylcyclohexane	6876-23-9	CC1CCCCC1C		0.0203584		0.0172091							0.371295	0.167157	0.00561702	0.0210836	0.0537357							0.0419712	0.0315514
725	Trans-1,2-dimethylcyclopentane	822-50-4	CC1CCCC1C	0.0759812	0.0707155	0	0							0.0973217	0.0956775	0.0274368	0.0275466
726	Trans-1,3-dimethylcyclohexane	112195	CC1CCCC(C1)C	0.0619494	0.0576562	0	0							0.0296806	0.0292152	0.00109892	0.00682156
727	Trans-1,3-dimethylcyclopentane	1759-58-6	CC1CCC(C1)C	0.181096	0.168545	0	0			0.0343115				0.219405	0.339384	0.00310003			0.00646461
728	Trans-1,3-pentadiene	2004-70-8	CC=CC=C	0.00441331	0.00410746	0	0
729	Trans-1,4-dimethylcyclohexane	112227	CC1CCC(CC1)C		0.015121	0	0							0.0089532	0.0230941		0.00945203
730	Trans-1,cis-2,3-trimethylcyclopentane	15890-40-1	CC1CCC(C1C)C											0.0611423	0.0753029	0.00694277	0.0169134
734	Trans-1-ethyl-3-methylcyclopentane	2613-65-2	CCC1CCC(C1)C	0.0369814	0.0344185	0.492215	0.458191							0.101889	0.132122		0.0244086		0.0216529
737	Trans-2-butene	624-64-6	CC=CC	0.260205	0.242172	0.00134725	0.00125413	0.0906385	0.00246808		0.124002	0.273057	0.230773	0.196901	0.220411	0.306993	0.242778	1.13263	0.360651			0.852171	0.144476		0.884657	0.665032
739	Trans-2-heptene	14686-13-6	CCCCC=CC	0.00435427	0.00405251	0	0							0.0576899	0.064988	0.0117752	0.0236948		0.00608119
740	Trans-2-hexene	4050-45-7	CCCC=CC	0.0262729	0.0244521	0	0	0.0397227				0.00474073	0.0040066	0.135531	0.171378	0.0123975	0.0409096		0.0050495				0.0444541	0.024787
741	Trans-2-octene	13389-42-9	CCCCCC=CC	0.00440593	0.00410059	0	0							0.0796244	0.107335	0.0060836	0.0397965		0.0494961
742	Trans-2-pentene	646-04-8	CCC=CC	0.122316	0.113839	0	0	0	0		0.00953863	0.0248781	0.0210256	0.36297	0.47345	0.0320233	0.0867869	0.0562454	0.00280286	0.397259		0.785146	0.0138919	0.296618	0.0439315	0.033025
743	Trans-3-heptene	14686-14-7	CCCC=CCC	0.0262474	0.0244284	0	0							0.0833597	0.105239	0.000701004	0.0246061
744	Trans-3-hexene	13269-52-8	CCC=CCC	0.03119	0.0290285	0	0
745	Trans-3-nonene	20063-92-7	CCCCCC=CCC											0.0434168	0.0494846		0.0113072
746	Trans-4-octene	14850-23-8	CCCC=CCCC	0.00814537	0.00758088	0	0							0.0529024	0.0439624				0.00698979
770	Vinylacetylene	689-97-4	C=CC#C	0.010138	0.00943542	0	0	0	0
839	Glyoxal	107-22-2	C(=O)C=O	0.00722697		0.00610784		0.323381															0.58346	1.50044
840	Hexaldehyde	66-25-1	CCCCCC=O	0.0995569	0.0926574	0.010399	0.00968016	0.0304903	0.122858	0.0210311				0.0018321	0.00184358	0.000924249	0.00430162	0.157349	0.165241				0.611244		0.1229	0.0923889
845	Valeraldehyde	110-62-3	CCCCC=O	0.0277589	0.0258352	0	0	0.0701463	0.00332431	0.0719915				0.0043196	0.00456995	0.0128595	0.0042074	0.340795	0.695009	0.138261				0.202428	0.266184	0.200101
846	Acenaphthene	83-32-9	C1CC2=CC=CC3=C2C1=CC=C3	0.00154126	0.0014838	0.00545318	0.0052499	0.00442689	0	0	0.000418531	0.00107764	0.00381283	0.10622	0.106177	0.0908867	0.0914162	0.00217497	0.00205651	0.00203017	0.00147877	0.00175151	0	0.0114478	0.00432463	0.0213867
847	Acenaphthylene	208-96-8	C1=CC2=C3C(=C1)C=CC3=CC=C2	0.0139392	0.0134196	0.0189119	0.0182069	0.0115771	0	0	0.00378522	0.0097462	0.0132231	0.218484	0.218395	0.186945	0.188034	0.00568796	0.00537816	0.00530928	0.0133741	0.0158408	0	0.0342546	0.0113097	0.0280913
871	1,4-dimethylnaphthalene; 1,5-dimethylnaphthalene; 2,3-dimethylnaphthalene	571-58-4; 571-61-9; 581-40-8	Cc1ccc(C)c2ccccc12																					0.0380705
873	Dibenzofuran (or DBZFUR)	132-64-9	C1=CC=C2C(=C1)C3=CC=CC=C3O2																				0.010946
875	1,7-dimethylnaphthalene	575-37-1	CC1=CC2=C(C=CC=C2C=C1)C																					0.0811994
877	1,2-dimethylnaphthalene	573-98-8	CC1=C(C2=CC=CC=C2C=C1)C																					0.0247592
879	2,6-dimethylnaphthalene; 2,7-dimethylnaphthalene	581-42-0; 582-16-1	Cc1ccc2cc(C)ccc2c1																					0.107556
881	9-fluorenone (or Fluorenone)	486-25-9	C1=CC=C2C(=C1)C3=CC=CC=C3C2=O																					0.0206326
883	Fluorene	86-73-7	C1C2=CC=CC=C2C3=CC=CC=C31	0.00343324	0.00330525	0.00876821	0.00844135	0.00814323	0	0	0.000932302	0.0024005	0.00613067	0.0558068	0.0557841	0.0477508	0.048029	0.00400086	0.00378294	0.00373449	0.00329405	0.00390159	0	0.0100727	0.00795512	0.0374268
885	1-methylfluorene	1730-37-6	CC1=C2CC3=CC=CC=C3C2=CC=C1	0.00297519	0.00286428	0.00671118	0.00646099	0.020611	0	0	0.000807918	0.00208023	0.00469241	0.0276887	0.0276774	0.0236917	0.0238297	0.0101264	0.00957484	0.0094522	0.00285457	0.00338105	0		0.0201349
941	Decanoic acid	334-48-5	CCCCCCCCCC(=O)O																				0.0278035
954	Lauric acid (or dodecanoic acid)	143-07-7	CCCCCCCCCCCC(=O)O																				0.0223115
976	Acetophenone	98-86-2	CC(=O)C1=CC=CC=C1																				1.9451
977	Beta-pinene	127-91-3	CC1(C2CCC(=C)C1C2)C					0.000708565
996	1-decene	872-05-9	CCCCCCCCC=C											0.0146687	0.013101		0.0736706							0.152853
997	Decanal	112-31-2	CCCCCCCCCC=O																				1.0679	5.843
1013	2,3-benzofuran	271-89-6	C1=CC=C2C(=C1)C=CO2																				0.0202901
1018	Heptanal	111-71-7	CCCCCCC=O																				0.889082
1042	Eicosane	112-95-8	CCCCCCCCCCCCCCCCCCCC	0.000993916	0.000956864	0.008587	0.00826689	0.0670063	0.00457271	0.00945557	0.000269899	0.000694938	0.00600397	0.0444461	0.044428	0.0380301	0.0382516	0.0375665	0.0355204	0.0350655	0.000953622	0.0011295	0.00945557	0.0311486	0.0654585	0.417975
1043	Heptadecane	629-78-7	CCCCCCCCCCCCCCCCC	0.00145651	0.00140221	0.0110799	0.0106668	0.180149	0.0206368	0.0426733	0.000395517	0.00101838	0.00774697	0.00123601	0.00123551	0.00105759	0.00106375	0.109475	0.103512	0.102186	0.00139746	0.0016552	0.0426733	0.015175	0.175988	1.04388
1045	Hexadecane	544-76-3	CCCCCCCCCCCCCCCC	0.00175128	0.001686	0.014397	0.0138603	0.228517	0.0362921	0.0750457	0.000475564	0.00122448	0.0100663	0.00145959	0.00145899	0.00124889	0.00125617	0.149143	0.14102	0.139214	0.00168028	0.00199019	0.0750457	0.00652257	0.223238	0.988118
1047	Nonadecane	629-92-5	CCCCCCCCCCCCCCCCCCC	0.000702361	0.000676178	0.00466256	0.00448875	0.106738	0.00760388	0.0157235	0.000190727	0.000491086	0.00326003	0.0874751	0.0874395	0.0748477	0.0752838	0.0601668	0.0568897	0.0561611	0.000673887	0.000798175	0.0157235	0.0543104	0.104273	0.950776
1048	Octadecane	593-45-3	CCCCCCCCCCCCCCCCCC	0.00156661	0.00150821	0.00987014	0.0095022	0.178595	0.0157913	0.0326537	0.000425417	0.00109537	0.00690113	0.216822	0.216734	0.185523	0.186604	0.103789	0.0981355	0.0968786	0.0015031	0.00178033	0.0326537	0.0198339	0.174469	0.966731
1049	Pentadecane	629-62-9	CCCCCCCCCCCCCCC	0.00231531	0.002229	0.016128	0.0155267	0.277769	0.10734	0.221961	0.000628727	0.00161885	0.0112766	0.00236574	0.00236477	0.00202423	0.00203603	0.245522	0.23215	0.229176	0.00222145	0.00263116	0.221961	0.0300837	0.271352	1.08292
1051	Tetradecane	629-59-4	CCCCCCCCCCCCCC	0.00507807	0.00488877	0.0288016	0.027728	0.280642	0.295768	0.611597	0.00137896	0.00355055	0.0201379	0.00468617	0.00468426	0.0040097	0.00403306	0.438366	0.41449	0.409181	0.0048722	0.0057708	0.611597	0.139237	0.274159	1.00102
1057	Nonanal	124-19-6	CCCCCCCCC=O																				1.67813
1065	Octanal	124-13-0	CCCCCCCC=O	0.0215751		0.0182341																	0.861298
1082	1-undecene	821-95-4	CCCCCCCCCC=C																			0.14
1083	Alpha-pinene	80-56-8	CC1=CCC2CC1C2(C)C					0.0382655
1093	1-butene & isobutene	106-98-9; 115-11-7	0	1.80453		1.52509
1098	1,2,4-trimethylbenzene & t-butylbenzene	0	0					0.0229325
1118	1,3-hexadiene (trans)	592-48-3	CCC=CC=C					0.0162365
1125	Isopropyltoluene	25155-15-1	CC1=CC=C(C=C1)C(C)C					0.068103
1161	Propyltoluene	28729-54-6	0	0.0864511		0.0730638		0.0547865
1462	p-Tolualdehyde	104-87-0	CC1=CC=C(C=C1)C=O																					0.048
1463	2,3-Butanedione	431-03-8	CC(=O)C(=O)C																				0.250054
1464	Methylglyoxal	78-98-8	CC(=O)C=O																				0.472325	1.24183
1467	o-Tolualdehyde	529-20-4	CC1=CC=CC=C1C=O							0.0476904				0.0445543	0.0177471		0.0333782	0.108634	0.603237					0.23	0.144245	0.144245
1540	Cis,trans,cis-1,2,4-trimethylcyclopentane	18679-30-6	CC1CC(C(C1)C)C											0.0721524	0.066596
1567	Unknown C11 aromatics	0	0																					0.324
1586	trans-1-Ethyl-2-methylcyclopentane	930-90-5	CCC1CCCC1C											0.0878673	0.107797	0.00153198	0.025525
1595	N-heneicosane	629-94-7	CCCCCCCCCCCCCCCCCCCCC	0.00119633	0.00115174	0.00896273	0.00862861	0.0378757	0.00354494	0.00733032	0.000324867	0.000836468	0.00626667	0.0525899	0.0525685	0.0449983	0.0452605	0.0222102	0.0210004	0.0207315	0.00114783	0.00135953	0.00733032	0.0193015	0.0370008	0.439446
1617	Octanoic acid	124-07-2	CCCCCCCC(=O)O																				0.0476741
1618	Nonanoic acid	112-05-0	CCCCCCCCC(=O)O																				0.0915343
1619	Undecanoic acid	112-37-8	CCCCCCCCCCC(=O)O																				0.0785669
1655	1-Methyl-2-tert-butylbenzene	1074-92-6	CC1=CC=CC=C1C(C)(C)C						0.0183691
1658	Undecanal	112-44-7	CCCCCCCCCCC=O																				0.991622
1659	Dodecanal	112-54-9	CCCCCCCCCCCC=O																				0.457672
1660	Tridecanal	7069-41-2	CCCCCCCCCCCCC=O																				0.762786
1690	2,6,10-Trimethyldodecane (or farnesane)	3891-98-3	CCC(C)CCCC(C)CCCC(C)C	0.00160094	0.00154126	0.00508306	0.00489357	0.136824	0.182392	0.377155	0.000434738	0.00111937	0.00355404	0.0243156	0.0243057	0.0208055	0.0209267	0.252523	0.238769	0.235711	0.00153604	0.00181934	0.377155		0.133663
1691	Undecane, 2,6,10-trimethyl	6864-53-5	CC(C)CCCC(C)CCCC(C)C																				0.100022
1692	2,6,10-trimethyltridecane	3891-99-4	CCCC(C)CCCC(C)CCCC(C)C	0.000442261	0.000425775	0.00122581	0.00118012	0.0967795	0.0433441	0.0896281	0.000120097	0.000309226	0.000857079	0.00125753	0.00125702	0.001076	0.00108227	0.0915839	0.0865957	0.0854865	0.000424332	0.000502593	0.0896281		0.0945439
1693	Norpristane	3892-00-0	CCCCCC(C)CCCC(C)CCCC(C)C																				0.215868
1694	N-Nonylcyclohexane	359071	CCCCCCCCCC1CCCCC1	0.000151353	0.000145711	0.00138883	0.00133706	0.0352689	0.0110015	0.0227491	4.11002e-05	0.000105825	0.00097106	0.00188841	0.00188764	0.00161581	0.00162523	0.0285048	0.0269523	0.0266071	0.000145217	0.000172	0.0227491	0.00958419	0.0344542
1695	Decylcyclohexane	1795-16-0	CCCCCCCCCCC1CCCCC1	0.000112288	0.000108102	0.00243483	0.00234406	0.0236503	0.00282737	0.0058465	3.0492e-05	7.8511e-05	0.00170241	0.00251861	0.00251759	0.00215504	0.0021676	0.0144921	0.0137027	0.0135272	0.000107736	0.000127606	0.0058465	0.0149087	0.023104
1704	Pristane	1921-70-6	CC(C)CCCC(C)CCCC(C)CCCC(C)C	0.000686032	0.000660458	0.0100513	0.00967665	0.169723	0.00935432	0.0193431	0.000186293	0.000479669	0.00702783	0.00421212	0.0042104	0.00360408	0.00362508	0.0928898	0.0878304	0.0867055	0.00065822	0.000779619	0.0193431	0.00914491	0.165802
1705	Phytane	638-36-8	CCC(C)CCCC(C)CCCC(C)CCCC(C)C	0.000669034	0.000644094	0.00537062	0.00517041	0.115405	0.0070506	0.0145794	0.000181677	0.000467784	0.0037551	0.0074999	0.00749684	0.00641726	0.00645464	0.0638628	0.0603844	0.059611	0.000641911	0.000760302	0.0145794	0.0115809	0.11274
1706	C3-naphthalenes	0	0	0.0184648	0.0177764	0.0407715	0.0392516	0.242523	0.00912582	0.0188706	0.00501414	0.0129104	0.0285071	0	0	0	0	0.128425	0.121431	0.119875	0.0177162	0.0209837	0.0188706		0.236921
1707	C4-naphthalenes	0	0	0.00405636	0.00390514	0.00555043	0.00534352	0.0286803	0	0	0.00110151	0.00283618	0.00388082	0	0	0	0	0.014091	0.0133235	0.0131528	0.00389191	0.00460972	0		0.0280178
1711	M- & p-tolualdehyde	0	0							0.134778
1712	2,5-Dimethylbenzaldehyde	5779-94-2	CC1=CC(=C(C=C1)C)C=O												0.0237206			0.142136	0.276538	0.389923			1.56371		0.188729	0.188729
1713	1-Indanone	83-33-0	C1CC(=O)C2=CC=CC=C21																				0.0265068
1714	Dibenzothiophene	132-65-0	C1=CC=C2C(=C1)C3=CC=CC=C3S2																				0.000755158
1716	Undecylcyclohexane	54105-66-7	CCCCCCCCCCCC1CCCCC1	6.93479e-05	6.67627e-05	0.00127549	0.00122794	0.015619	0.00111994	0.00231584	1.88315e-05	4.84875e-05	0.000891812	0.000201947	0.000201864	0.000172795	0.000173801	0.00881156	0.00833162	0.00822491	6.65365e-05	7.88081e-05	0.00231584	0.00411321	0.0152582
1717	Dodecylcyclohexane	1795-17-1	CCCCCCCCCCCCC1CCCCC1	6.3726e-05	6.13504e-05	0.000736746	0.000709281	0.0157897	0.000898819	0.0018586	1.73049e-05	4.45567e-05	0.000515127	0.00613398	0.00613148	0.00524851	0.00527909	0.00867077	0.0081985	0.00809349	6.11425e-05	7.24193e-05	0.0018586		0.015425
1801	C2-Naphthalenes	0	0	0.0552131	0.0531549	0.116453	0.112112	0.398453	0.0309213	0.0639399	0.0149932	0.0386046	0.0814234	0	0	0	0	0.227178	0.214804	0.212053	0.0529748	0.0627451	0.0639399		0.389248
1840	Heptylcyclohexane	5617-41-4	CCCCCCCC1CCCCC1	0.000443449	0.000426917	0.00219695	0.00211505	0.0592529	0.0701055	0.144966	0.000120419	0.000310056	0.00153609	0.00360798	0.00360652	0.00308716	0.00310514	0.100335	0.0948698	0.0936546	0.000425471	0.000503942	0.144966	0.0447262	0.0578842
1841	Octylcyclohexane	1795-15-9	CCCCCCCCC1CCCCC1	0.000245994	0.000236824	0.00156165	0.00150344	0.0344997	0.0338107	0.0699147	6.68002e-05	0.000171997	0.0010919	0.00181227	0.00181153	0.00155066	0.00155969	0.0512998	0.0485057	0.0478844	0.000236022	0.000279552	0.0699147	0.0211651	0.0337028
1845	8B,13a-dimethyl-14B-[3'-methylbutyl]podocarpane	0	0																				0.00526322
1883	Methyl fluorene	26914-17-0	CC1=CC2=Cc3c(C2C=C1)cccc3																				0.0248668
1899	4-Phenyl-1-butene	768-56-9	C=CCCC1=CC=CC=C1																			0.248949
1923	C10 Aromatic	0	0								0.00953863
1925	C10 Olefins	0	0								0.0190773													4.82769
1926	C10 Paraffins	0	0																					12.068
1936	C14-Branched alkane	0	0																					0.15368
1938	C15-Branched alkane	0	0																					0.177
1939	C16 Branched alkane	0	0																					0.146
1943	C-18 Compounds	0	0																					0.002
1964	C3/C4/C5 Alkylbenzenes	0	0								0.00953863
1989	C5 Olefin	0	0											0.0130471	0.00843276				0.081488
1999	C-6 Compounds	0	0		0.0189411		0.0160111			0.737019				0.0700015	0.0674954	0.126618	0.15023	0.338381	0.423816						0.264298	0.198684
2005	C-7 Compounds	0	0											0.727883	0.260905	0.0984872	0.0946987	0.0346453	0.0440365						0.0270604	0.0203423
2011	C-8 Compounds	0	0							0.0743698				0.157807	0.112702	0.00190757	0.00814614	0.0297407	0.0211974						0.0232295	0.0174625
2020	C9 Olefins	0	0								0.0381545
2036	Cyclopentylcyclopentane	0	C1CCC(C1)C2CCCC2																			0.440448
2054	Dimethyl napthalene	28804-88-8	CC1=CC2=C(C=C1)C=C(C=C2)C																					0.09
2108	Heptene	25339-56-4	CCCCCC=C								0.00953863													0.361891
2116	Hexyne	0	CCCCC#C																			0.0191499
2119	Isobutyraldehyde	78-84-2	CC(C)C=O		0.0114603		0.00968751				0.0190773			0.00929981	0.00960308	0.0131637	0.0188751	0.464	0.527899	0.629355					0.362416	0.272442
2120	Isomers of butene	0	0								0.248004
2126	Isomers of heptane	0	0								0.0381545
2127	Isomers of hexane	73513-42-5	CCCC(C)C								0.0190773
2128	Isomers of nonane	0	0								0.00953863
2129	Isomers of octadecane	0	0	0.000399138	0.000384259	0.00284623	0.00274013	0.124547	0.00823735	0.0170334	0.000108387	0.000279074	0.00199006	0.00506512	0.00506306	0.00433395	0.0043592	0.0695601	0.0657714	0.064929	0.000382957	0.000453587	0.0170334		0.12167
2130	Isomers of octane	0	0								0.0190773
2132	Isomers of pentane	0	0								0.124002
2164	Methylbenzaldehyde	1334-78-7	CC1=CC=CC=C1C=O	0.17367	0.035918	0.146777	0.0303617							0.044274	0.0730319	0.256393	0.18552	1.02267	1.31645	0.506337					0.798772	0.600468
2170	Methylcyclooctane	0	0																			0.315973
2185	Methylhexenes	0	0											0.0257732	0.0286701		0.00406535
2225	Pentyne	0	CCCC#C																			0.181924
2243	Trans-1-phenylbutene	0	0																			0.23
2244	Trans-2-nonene	6434-78-2	CCCCCCC=CC											0.0120605	0.00771435							0.162774
2258	Trans-1,3-dichloropropene	10061-02-6	C(C=CCl)Cl					0.00236188
2284	Unidentified	0	0																			4.83535
2297	Unknown	0	0					3.5835	0.433574												0		0
2329	1-tert-butyl-4-ethylbenzene	7364-19-4	CCC1=CC=C(C=C1)C(C)(C)C							0.287909				0.0543272	0.058385		0.0223387
2336	Chrysene;Triphenylene	218-01-9; 217-59-4	C1=CC2=C(C=C1)C1=C(C=C2)C2=C(C=CC=C2)C=C1																				0.00127767
2339	Methyl benzenediols	80934-44-7	0																				0.294435
2560	Cyclopentane, (1-methylethyl)	3875-51-2	CC(C)C1CCCC1											0.0109464	0.0325558	0.0046577	0.00575049
2568	2-methyl-butyl-benzene	3968-85-2	CCC(C)CC1=CC=CC=C1						0.0281959					0.149945	0.149097	0.0112953
2673	2,6-dimethylheptane, propylcyclopentane	1072-05-5; 2040-96-2	0					0.000542358
2802	Octylbenzene (or Phenyloctane)	2189-60-8	CCCCCCCCC1=CC=CC=C1	0.000173308	0.000166848	0.000284063	0.000273474	0.0109869	0	0	4.70622e-05	0.000121176	0.000198615	0.13915	0.139094	0.119063	0.119757	0.00539799	0.00510398	0.00503861	0.000166282	0.000196951	0		0.0107331
2998	Dimethylbenzaldehyde	28351-09-9	CC1=C(C(=CC=C1)C=O)C							0.017559
3337	ROCP5ARO	0	0	0.360607	0.347165	1.72723	1.66284	0.00290933	0.000300415	0.000621205	0.0979236	0.252134	1.20766	0.0219619	0.021953	0.0187916	0.0189011	0.00173459	0.00164011	0.00161911	0.345988	0.4098	0.000621205	0.00921526	0.00284212	0
3338	ROCP6ARO	0	0	1.8978	1.82705	6.23263	6.00029	0.00419372	0.0089128	0.000871086	0.515351	1.32693	4.35781	0.0100544	0.0100503	0.0079189	0.00865314	0.000306481	0.000289788	0.000286077	1.82086	2.15669	0.0184301	0.00467971	0.00409685	5.44675e-06
3377	ROCP3CYC	0	0	0.141682	0.1364	1.01476	0.976935	3.43526	0.521387	1.07814	0.0384739	0.0990629	0.709515	0.000232625	0.00023253	0.000199045	0.000200204	1.01929	0.963774	0.95143	0.135938	0.16101	1.0761	0.709526	3.35591	13.2285
3378	ROCP4CYC	0	0	0.0683845	0.0658352	0.887912	0.854812	9.58826	1.21239	2.50701	0.0185699	0.0478139	0.620822	0.0099689	0.00996484	0.00852985	0.00857954	3.33709	3.15533	3.11491	0.0656122	0.0777133	2.49606	1.70298	9.36677	8.70532
3379	ROCP5CYC	0	0	0.010556	0.0101625	0.00131812	0.00126898	15.6212	7.15845	14.8024	0.0028665	0.00738068	0.000921617	0.301029	0.300907	0.257575	0.259075	6.35484	6.00872	5.93176	0.0101281	0.011996	14.7776	2.48592	15.2603	9.17177
3380	ROCP6CYC	0	0	0.0573727	0.0552339	0.000303501	0.000292187	14.0543	8.16777	16.8418	0.0155797	0.0401146	0.000212206	0.00162378	0.00162312	0.00138938	0.00139747	6.26972	5.28557	5.69645	0.0550468	0.0651993	13.3339	8.16694	13.3967	5.33489
3388	ROCP3BRN	0	0	0.0234937	0.0226179	0.143397	0.138051	0.605988	0.115665	0.239175	0.00637976	0.0164266	0.100262	0.00959263	0.00958872	0.00820789	0.00825571	0.180259	0.170441	0.168258	0.0225413	0.0266987	0.233911	0.15873	0.59199	2.99779
3389	ROCP4BRN	0	0	0.0242106	0.023308	0.157015	0.151162	1.14124	0.189432	0.391713	0.00657442	0.0169279	0.109784	0.00206329	0.00206245	0.00176544	0.00177573	0.325619	0.307884	0.303941	0.0232291	0.0275133	0.173937	0.233242	1.11488	8.3674
3390	ROCP5BRN	0	0	0.041389	0.039846	0.258762	0.249115	2.46138	1.27168	2.6296	0.0112392	0.0289389	0.180924	0.0305618	0.0305493	0.0261501	0.0263024	1.12062	1.05958	1.04601	0.039711	0.0470351	1.57238	0.666667	2.40452	5.30319
3391	ROCP6BRN	0	0	0.0959673	0.0923898	0.491441	0.473121	2.7734	3.12773	6.46759	0.0260601	0.0670996	0.343612	0.0146255	0.0176881	0.050637	0.0175538	1.33097	1.25847	1.24235	0.0920768	0.109059	3.79784	2.65079	2.70934	3.53321
3399	ROCP3ALK	0	0	0.102553	0.0987295	0.584987	0.563179	0.122591	0.0125554	0.0259623	0.0278483	0.071704	0.409018	0.0164042	0.0163975	0.0140362	0.014118	0.0293336	0.0277359	0.0273806	0.098395	0.116542	0.00365081	0.00180961	0.119759	0.00590209
3400	ROCP4ALK	0	0	0.0945225	0.0909989	0.749445	0.721507	0.621557	0.0191265	0.0395503	0.0256678	0.0660895	0.524007	0.00463257	0.00463069	0.00396384	0.00398694	0.200058	0.189161	0.186739	0.0906905	0.107417	0.0117468	0.00455646	0.607199	0.00769436
3401	ROCP5ALK	0	0	0.105029	0.101114	0.687469	0.661841	1.0646	0.331497	0.685477	0.0285209	0.0734356	0.480673	0.00580519	0.00580283	0.00496719	0.00499613	0.0210593	0.0199123	0.0196572	0.100771	0.119357	0.0119371	0.387599	1.04001	0.00699883
3402	ROCP6ALK	0	0	0.356703	0.343405	1.64562	1.58428	0.203717	0.572522	1.0491	0.0968632	0.249404	1.15061	0.00220763	0.00513043	0.0217106	0.0218371	0.0357324	0.0337862	0.0333534	0.342242	0.0353628	0.115975	0.0590691	0.199012	0.0377962
3405	n-Heptylbenzene	1078-71-3	CCCCCCCC1=CC=CC=C1	0.00078038	0.000751289	0.00151407	0.00145763	0.0233566	0	0	0.000211914	0.000545636	0.00105863	0.316862	0.316733	0.271122	0.272701	0.0114753	0.0108503	0.0107113	0.000748743	0.000886837	0		0.0228171
3406	Nonylbenzene	1081-77-2	CCCCCCCCCC1=CC=CC=C1	6.71301e-05	6.46276e-05	0.000132237	0.000127307	0.00697289	0	0	1.82293e-05	4.69369e-05	9.24588e-05	0.126843	0.126791	0.108533	0.109165	0.00342586	0.00323926	0.00319777	6.44086e-05	7.62878e-05	0		0.00681182
3407	Decylbenzene	104-72-73	CCCCCCCCCCC1=CC=CC=C1	4.52912e-05	4.36028e-05	0.000119643	0.000115183	0.00425503	0	0	1.22989e-05	3.16673e-05	8.36535e-05	0.0829083	0.0828745	0.0709401	0.0713534	0.00209053	0.00197667	0.00195135	4.34551e-05	5.14697e-05	0		0.00415674
3408	Undecylbenzene	6742-54-7	CCCCCCCCCCCC1=CC=CC=C1	2.67068e-05	2.57112e-05	9.23553e-05	8.89124e-05	0.00345423	0	0	7.25228e-06	1.86732e-05	6.45741e-05	0.08025	0.0802173	0.0686656	0.0690656	0.00169709	0.00160466	0.00158411	2.56241e-05	3.035e-05	0		0.00337444
3409	Dodecylbenzene	123-01-3	CCCCCCCCCCCCC1=CC=CC=C1	1.46203e-05	1.40752e-05	8.326e-05	8.01562e-05	0.00206888	0	0	3.97016e-06	1.02224e-05	5.82148e-05	0.052858	0.0528365	0.0452277	0.0454912	0.00101646	0.000961098	0.000948788	1.40276e-05	1.66147e-05	0		0.00202109

## Sheet: Table S5
Table S5a. Volatility distributions for CROC compounds only
Species	ID	log10(C*)	Gas_Cold_Start	Gas_Hot_Running	Gas_Nonroad	Gas_Turbine	Diesel_NonDPF	Diesel_DPF	Diesel_Nonroad	ResidualOil_Marine
ROCN2ALK	3394	-2	0.102633	0.0767403	0.102633	0.0214958	0.0596412	0.0380951	0	0.55371
ROCN1ALK	3395	-1	0.0284995	0.137417	0.0284995	0.102281	0.0410547	0.00413558	0.0319016	0.0787319
ROCP0ALK	3396	0	0.0619235	0.0511544	0.0619235	0.21607	0.0527885	0.00691889	0.207628	0.072236
ROCP1ALK	3397	1	0.296008	0.282889	0.296008	0.319004	0.154898	0.5159	0.266441	0.0805709
ROCP2ALK	3398	2	0.31622	0.224529	0.31622	0.172646	0.173676	0.235912	0.265728	0.0922425
ROCP3ALK	3399	3	0.194717	0.227271	0.194717	0.168504	0.517942	0.199039	0.228302	0.122508
Table S5b. Volatility distributions including IVOCs up to C* < 3.2 x 105 μg m-3
Species	ID	log10(C*)	Gas_Cold_Start	Gas_Hot_Running	Gas_Nonroad	Gas_Turbine	Diesel_NonDPF	Diesel_DPF	Diesel_Nonroad	ResidualOil_Marine
ROCN2ALK	3394	-2	0.0606082	0.0458312	0.0606082	0.00938563	0.0145663	0.0146948	0	0.418653
ROCN1ALK	3395	-1	0.0168299	0.0820688	0.0168299	0.0446585	0.0100269	0.00159526	0.0179	0.0595282
ROCP0ALK	3396	0	0.036568	0.0305507	0.036568	0.0943421	0.0128927	0.0026689	0.1165	0.0546166
ROCP1ALK	3397	1	0.174803	0.168948	0.174803	0.139286	0.0378311	0.199003	0.1495	0.0609186
ROCP2ALK	3398	2	0.186739	0.134094	0.186739	0.0753818	0.0424173	0.0910009	0.1491	0.0697433
ROCP3ALK	3399	3	0.114987	0.135732	0.114987	0.0735732	0.126498	0.0767774	0.1281	0.092627
ROCP4ALK	3400	4	0.122181	0.157194	0.122181	0.167389	0.324104	0.191908	0.276	0.143884
ROCP5ALK	3401	5	0.287284	0.245582	0.287284	0.395984	0.431664	0.422352	0.1629	0.100029
Reference			Lu et al. (2018)	Lu et al. (2018)	Lu et al. (2018)	Lu et al. (2018)	Lu et al. (2018)	Lu et al. (2018)	Jathar et al. (2020)	Huang et al. (2018)

## Sheet: Table S8
Table S8. CROC-compatible PM Speciation Profiles (in weight percent)
Species ID	Name	100CROC	101CROC	102CROC	103CROC	104CROC	105CROC	106CROC	107CROC	108CROC	109CROC	110CROC	111CROC	112CROC	113CROC	114CROC
292	Aluminum		0.32396	0.0601539	0.0585738	0.105377	0.89	0.89		0.0601539	0.105377	0.0601539		0.0601539	0.0601539
296	Antimony								0.02							0.0614657
298	Arsenic
300	Barium															0.0520095
328	Cadmium								0.01							0.0236407
329	Calcium	0.387693	1.44307	0.584029	0.34711	0.469678	0.21	0.44	0.03	0.584029	0.469678	0.584029		0.584029	0.584029	1.91253
347	Chromium	0.0204722	0.0730997				0.25	0.25					0.0262134
379	Cobalt						0.39	0.4
380	Copper		0.0958036													0.0141844
487	Indium								0.01							0.0378251
488	Iron	0.306917	1.82792	0.344381	0.127637	0.640951	0.25	0.25	0.01	0.344381	0.640951	0.344381		0.344381	0.344381	0.0780142
519	Lanthanum															0.0957447
520	Lead	0.0255347	0.0475578						0.03
525	Magnesium	0.0191371	0.144565	0.132664	0.0114393	0.137222				0.132664	0.137222	0.132664	0.387301	0.132664	0.132664	0.333333
526	Manganese		0.0239079
586	Molybdenum		0.0211559													0.0141844
612	Nickel	0.00762146	0.0269179				0.04									0.0260047
613	Nitrate	0.262746	0.288701	1.25158	0.180157				0.07	1.25158		1.25158		1.25158	1.25158
649	Palladium
666	Phosphorus	0.151428	0.433954				0.04	0.15	0.03							0.195035
669	Potassium		0.0851396	0.262455	0.019473	0.0471885				0.262455	0.0471885	0.262455		0.262455	0.262455
689	Rubidium
694	Silicon		0.32396	0.297084	0.218712	0.0876158	0.46	0.59	0.12	0.297084	0.0876158	0.297084		0.297084	0.297084	0.340426
695	Silver
696	Sodium	0.0051777	0.0391298	0.307717	0.0346272	0.98644				0.307717	0.98644	0.307717		0.307717	0.307717
697	Strontium
699	Sulfate	0.945117	7.18724	5.26653	1.02837	59.9053	0.64	1.04	0.05	5.26653	59.9053	5.26653	6.8674	5.26653	5.26653	12.078
700	Sulfur								0.0166667
714	Tin															0.035461
715	Titanium		0.0340558	0.00930904	0.00866996	0.0163951				0.00930904	0.0163951	0.00930904		0.00930904	0.00930904	0.0141844
767	Vanadium															0.0827423
778	Zinc	0.0784399	0.592795				0.14	0.2	0.03							0.200946
784	Ammonium	0.430696	2.77899	1.73942	0.357757					1.73942		1.73942	1.7919	1.73942	1.73942
795	Chlorine atom	0.0214736	0.104404	0.375973	0.127879	0.0394464				0.375973	0.0394464	0.375973		0.375973	0.375973
797	Elemental Carbon	44.3689	14.0004	46.4031	78.9727	9.98421	9.25	11.12	12.178	46.4031	9.98421	46.4031	6.91944	46.4031	46.4031	7.0922
810	Bromine Atom		0.0216719
2302	Potassium ion												0.976828
2670	Metal-bound Oxygen	0.406385	2.68044						0.19453				0.125065			0.814648
2671	Other Unspeciated PM2.5	1.39534	0.563211	1.2835	1.08821	0.780485	43.05	39.74	27.815	1.2835	0.780485	1.2835	48.8006	1.2835	1.2835	23.3059
3394	ROCN2ALK	6.52124	6.63795	5.15699	2.15508	1.27464	4.40841	4.46303	5.89931	0	0	5.15699	0.881686	5.15699	5.15699	33.5646
3395	ROCN1ALK	1.81084	11.8864	3.54987	1.48347	0.138374	7.89402	7.99183	10.5637	1.72311	1.10789	3.54987	4.19522	3.54987	3.54987	4.77255
3396	ROCP0ALK	3.93459	4.4248	4.56445	1.90746	0.231502	2.93861	2.97502	3.93243	11.2147	7.21055	4.56445	8.86249	4.56445	4.56445	4.37878
3397	ROCP1ALK	18.8082	24.4695	13.3935	5.59709	17.2617	16.2507	16.4521	21.7467	14.3914	9.25302	13.3935	13.0845	13.3935	13.3935	4.88402
3398	ROCP2ALK	20.0925	19.4215	15.0172	6.27562	7.89349	12.8982	13.058	17.2603	14.3529	9.22827	15.0172	7.08136	15.0172	15.0172	5.59152

## Sheet: Table S10
Table S10a. Statistical evaluation of OC predictions at Air Quality System sites grouped by region and season for the EQUATES case.								Table S10b. Statistical evaluation of OC predictions at Air Quality System sites grouped by region and season for the ROC case.
Region	Season	NMB	MB	RMSE	COR			Region	Season	NMB	MB	RMSE	COR
WE	Spring	-12.2844	-0.297582	1.96255	0.392203			WE	Spring	-29.5515	-0.715868	1.96178	0.37267
	Summer	-2.97778	-0.0945695	1.45318	0.685937				Summer	-27.1393	-0.861899	1.5263	0.680865
	Autumn	-16.2627	-0.679533	3.09445	0.47352				Autumn	-29.6271	-1.23796	3.1837	0.461337
	Winter	-35.8928	-1.62583	4.04937	0.429451				Winter	-42.3702	-1.91923	4.15412	0.414513
SW	Spring	19.3752	0.207348	1.29632	0.0819961			SW	Spring	7.90404	0.0845866	1.30067	0.0569752
	Summer	-23.5855	-0.490938	0.91253	0.537057				Summer	-38.1882	-0.794898	1.07045	0.598809
	Autumn	-27.9686	-0.665157	2.54781	0.407572				Autumn	-36.2077	-0.861102	2.61929	0.395923
	Winter	-4.24484	-0.0930995	1.43418	0.536935				Winter	-8.43669	-0.185037	1.4883	0.507032
NW	Spring	12.9482	0.175644	0.796065	0.651493			NW	Spring	4.56367	0.0619066	0.751788	0.613063
	Summer	-24.8922	-0.77372	2.88133	0.843991				Summer	-36.709	-1.14102	3.01839	0.869222
	Autumn	-11.8309	-0.476146	4.47804	0.458421				Autumn	-16.868	-0.678869	4.49959	0.44275
	Winter	21.5884	0.638366	2.41972	0.632173				Winter	20.8751	0.617274	2.48198	0.621386
NR	Spring	-2.96591	-0.0268147	0.760083	0.64818			NR	Spring	-16.3233	-0.147578	0.744965	0.636639
	Summer	-55.9677	-1.44834	2.8348	0.621613				Summer	-62.9923	-1.63012	2.90053	0.692321
	Autumn	-51.7821	-1.14442	4.31063	0.59841				Autumn	-58.7666	-1.29878	4.34921	0.664037
	Winter	-11.6648	-0.135233	2.22337	0.0148007				Winter	-23.3095	-0.270233	2.19024	0.0248958
SO	Spring	27.2338	0.533213	1.83188	0.704383			SO	Spring	8.45711	0.165582	1.74474	0.685912
	Summer	11.3637	0.229378	1.3444	0.537896				Summer	-15.8558	-0.320051	1.12997	0.532346
	Autumn	12.5565	0.324123	1.77345	0.537624				Autumn	-10.3349	-0.266776	1.54898	0.534073
	Winter	12.354	0.256277	1.69331	0.483207				Winter	-1.12715	-0.0233819	1.59432	0.478414
SE	Spring	12.4552	0.254049	1.20207	0.729027			SE	Spring	-9.39317	-0.191593	1.15536	0.720559
	Summer	19.4796	0.423288	1.12888	0.739698				Summer	-7.62255	-0.165637	0.895771	0.721985
	Autumn	21.9764	0.623555	1.58904	0.720883				Autumn	-3.99355	-0.113313	1.24794	0.721191
	Winter	14.1059	0.400823	1.70152	0.674383				Winter	-4.29475	-0.122037	1.55904	0.676277
UM	Spring	44.0722	0.586283	1.14818	0.709524			UM	Spring	18.6628	0.248268	0.975542	0.657516
	Summer	-14.1755	-0.329667	1.12904	0.570925				Summer	-38.2043	-0.888483	1.25856	0.586696
	Autumn	17.4738	0.334449	1.41489	0.481747				Autumn	-7.54262	-0.144366	1.21574	0.477091
	Winter	86.9243	1.3047	1.79062	0.705705				Winter	65.3338	0.980633	1.5087	0.672842
OV	Spring	27.2807	0.421692	1.00055	0.667008			OV	Spring	-1.1748	-0.0181595	0.867434	0.615818
	Summer	-4.08173	-0.101463	1.01427	0.633059				Summer	-30.6171	-0.761077	1.13265	0.634424
	Autumn	16.619	0.389583	1.22143	0.687675				Autumn	-9.6532	-0.226291	1.05705	0.677234
	Winter	39.1998	0.765855	1.39708	0.718106				Winter	19.8516	0.387844	1.21799	0.691062
NE	Spring	62.3679	0.76844	1.37671	0.662392			NE	Spring	23.03	0.283755	0.961925	0.638779
	Summer	11.4671	0.273896	1.25015	0.676716				Summer	-19.4249	-0.463969	1.06705	0.657906
	Autumn	44.8663	0.985261	2.03262	0.580366				Autumn	9.90307	0.217471	1.46088	0.558174
	Winter	88.5485	1.66261	2.43953	0.603115				Winter	60.5202	1.13634	2.03645	0.573187
WE = West
SW = Southwest
NW = Northwest
NR = Northern Rockies
SO = South
SE = Southeast
UM = Upper Midwest
OV = Ohio Valley
NE = Northeast

## Sheet: Table S11
Table S11a. Emissions and production of POA and SOA, respectively, normalized to inventory nonvolatile POA and NMOG emissions (g/g).
Ambient Pollutant	Inventoried Pollutant	Annual	Winter	Spring	Summer	Autumn
POA	PM-OM	0.6535	0.7675	0.6801	0.5503	0.6454
SOA	NMOG	0.1351	0.1098	0.1417	0.1466	0.1393
OA	PM-OM + NMOG	0.1559	0.1346	0.1644	0.1618	0.1612
Table S11b. Ambient Mobile POA and SOA surface concentrations normalized to inventory nonvolatile POA and NMOG respectively (μg m-3 / g s-1).
Ambient Pollutant	Inventoried Pollutant	Annual	Winter	Spring	Summer	Autumn
POA	PM-OM	64.3	92.3	50.7	48.1	71.3
SOA	NMOG	2.58	2.46	1.96	2.79	3.03

[truncated: 1 more sheets: Table S12]
